# Supplementary material for: Molecularly precise self-assembly of theranostic nanoprobes within a single-molecular framework for in vivo tracking of tumor-specific chemotherapy
Source: Chem Sci. 2018 Apr 24;9(22):4959–69. doi: 10.1039/c8sc01069b (PMC5989654; doi:10.1039/c8sc01069b)
Supplement: Supplementary file 1 [file SC-009-C8SC01069B-s001.pdf]

Electronic Supplementary Information (ESI)

## **Molecularly precise self-assembling theranostic nanoprobe within single-molecular framework for *in vivo* tracking tumor-specific chemotherapy**

Chenxu Yan,<sup>a</sup> Zhiqian Guo,<sup>\*a</sup> Yanyan Shen,<sup>b</sup> Yi Chen,<sup>b</sup> He Tian<sup>a</sup> and Wei-Hong Zhu<sup>\*a</sup>

<sup>a</sup>Key Laboratory for Advanced Materials and Institute of Fine Chemicals, Shanghai Key Laboratory of Functional Materials Chemistry, East China University of Science and Technology, Shanghai 200237, China.

<sup>b</sup>Division of Anti-Tumor Pharmacology, State Key Laboratory of Drug Research, Shanghai Institute of Materia Medica, Chinese Academy of Sciences, Shanghai 201203, China

E-mail: whzhu@ecust.edu.cn; guozq@ecust.edu.cn

## Contents

|     |                                                                               |         |
|-----|-------------------------------------------------------------------------------|---------|
| 1.  | Experimental Section                                                          | S3-S10  |
| 2.  | Stability of BP20-DCM-S-CPT micelle                                           | S11-S12 |
| 3.  | TEM Image of BP <sub>5</sub> -DCM-S-CPT and BP <sub>20</sub> -DCM-S-CPT & GSH | S12     |
| 4.  | Proposed Mechanism of BP <sub>n</sub> -DCM-S-CPT Reaction with GSH            | S13     |
| 5.  | ESI-MS Spectra Characterization of DCM-S-CPT Reaction with GSH                | S13     |
| 6.  | Effect of Self-Assembled Nanostructure Formation on GSH-Induced Drug Release  | S14     |
| 7.  | HPLC Chromatogram of BP20-DCM-S-CPT                                           | S15     |
| 8.  | Selectivity of BP20-DCM-S-CPT                                                 | S15     |
| 9.  | Cytotoxicity of DCM-S-CPT, BP5-DCM-S-CPT and BP20-DCM-S-CPT                   | S16     |
| 10. | Confocal Laser Scanning Microscopy Images of HeLa Cells                       | S16     |
| 11. | Antitumor Activity of BP <sub>n</sub> -DCM-SCPT                               | S17-S18 |
| 12. | Characterization of Intermediate Compounds and BP <sub>n</sub> -DCM-S-CPT     | S19-S28 |

## 1. Experimental Section

### Materials and General Methods

Unless special stated, all solvents and chemicals were purchased from commercial suppliers in analytical grade and used without further purification. Biotin-PEG<sub>5</sub>-N<sub>3</sub> and Biotin-PEG<sub>20</sub>-N<sub>3</sub> was supplied by Biomatrik Inc. (Jiaxing, China). The <sup>1</sup>H and <sup>13</sup>C NMR spectra were recorded on a Bruker AM 400 spectrometer, using TMS as an internal standard. High resolution mass spectrometry data were obtained with a Waters LCT Premier XE spectrometer. Absorption spectra were collected on a Varian Cary 500 spectrophotometer, and fluorescence spectra measurements were performed on a Varian Cary Eclipse fluorescence spectrophotometer. Transmission electron microscopy (TEM) images were obtained on a JEOL 100CX transmission electron microscope operating at an accelerating bias voltage of 100 kV. Particle size was measured by dynamic light scattering (DLS) with a NICOMP 380 ZLS. HPLC analysis was performed on an Agilent 1100 series. Confocal fluorescence images were taken on confocal laser scanning microscope (CLSM, Nikon A1R/A1). Flow cytometric analysis was carried out with a FACSCalibur flow cytometer (BD Biosciences, Franklin Lakes, NJ, USA). *In vivo* fluorescence images in *vivo* fluorescence images were measured with a PerkinElmer IVIS Lumina Kinetic Series III imaging system.

### Synthesis of DCM-S-CPT, BP<sub>5</sub>-DCM-S-CPT and BP<sub>20</sub>-DCM-S-CPT

The intermediate compound CPT-S-OH<sup>1</sup> was synthesized by the established procedures.

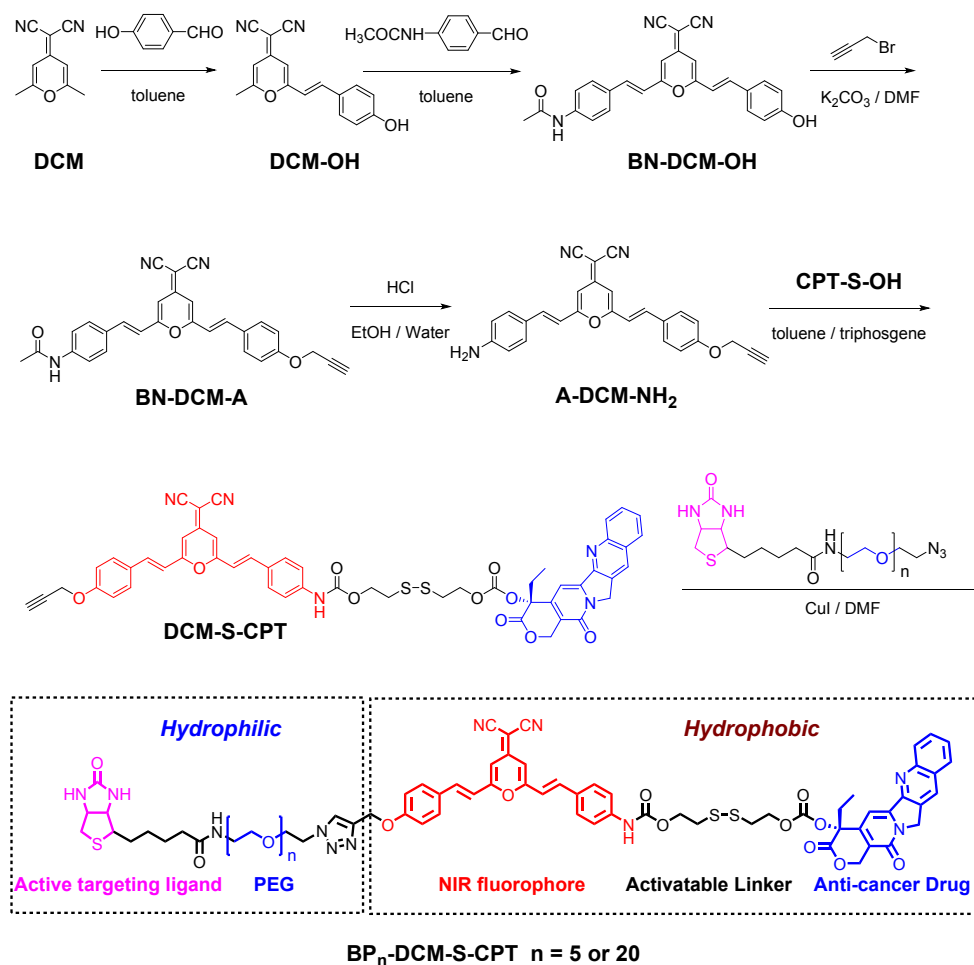

**Scheme S1.** Synthetic route of DCM-S-CPT, BP<sub>5</sub>-DCM-S-CPT and BP<sub>20</sub>-DCM-S-CPT

### Synthesis of DCM-OH

DCM (1.04 g, 6.0 mmol) and 4-hydroxybenzaldehyde (0.36 g, 2.96 mmol) were dissolved in toluene (30 mL) with acetic acid (0.5 mL) and piperidine (1.0 mL). Then the mixture was refluxed for 10 h under an argon atmosphere. The solvent was removed under reduced pressure, and then the crude product was purified by silica gel chromatography using dichloromethane/ethyl acetate/PE (v/v/v, 1:1:1) as the eluent to afford DCM-OH as a yellow solid (184 mg): Yield 23%. <sup>1</sup>H NMR (400 MHz, DMSO-*d*<sub>6</sub>, ppm)  $\delta$ : 2.45 (s, 3H, -CH<sub>3</sub>), 6.68 (s, 1H, ph-H), 6.83 (d, 3H, ph-H), 7.14 (d, 1H, *J* = 16.0 Hz, alkene-H), 7.47 (d, 1H, *J* = 16.0 Hz, alkene-H), 7.56 (d, 2H, *J* = 8.0 Hz, ph-H), 10.08 (s, 1H, -OH). <sup>13</sup>C NMR (100 MHz, DMSO-*d*<sub>6</sub>, ppm):  $\delta$  163.94, 160.46, 159.71, 156.71, 137.82, 129.97, 125.92, 115.92, 115.57, 115.39, 105.90, 105.67, 54.98, 19.36. Mass spectrometry (ESI-MS, *m/z*): [M - H]<sup>-</sup> calcd for C<sub>17</sub>H<sub>11</sub>N<sub>2</sub>O<sub>2</sub>, 275.0821; found, 275.0818

### Synthesis of BN-DCM-OH

DCM-OH (100 mg, 0.36 mmol) and N-(4-formylphenyl) acetamide (118 mg, 0.72 mmol) were dissolved in dry toluene (30 mL) with acetic acid (0.5 mL) and piperidine (1.0 mL). Then the mixture was refluxed for 10 h under an argon atmosphere. The solvent was removed under reduced pressure, and then the crude product was purified by silica gel chromatography using dichloromethane/methyl alcohol (v/v, 50:1) as the eluent to afford BN-DCM-OH as a red solid (110 mg): Yield 72%. <sup>1</sup>H NMR (400 MHz, DMSO-*d*<sub>6</sub>, ppm)  $\delta$ : 2.08 (s, 3H, -CH<sub>3</sub>), 6.81 (d, 2H, *J* = 10.0 Hz, ph-H), 6.85 (d, 2H, *J* = 8.6 Hz, ph-H), 7.17 (d, 1H, *J* = 16.0 Hz, alkene-H), 7.28 (d, 1H, *J* = 16.0 Hz, alkene-H), 7.68 (d, 5H, *J* = 10.0 Hz, ph-H), 7.75 (d, 3H, *J* = 8.8 Hz, ph-H), 10.09 (s, 1H, -OH), 10.18 (s, 1H, -NH). <sup>13</sup>C NMR (100 MHz, DMSO-*d*<sub>6</sub>, ppm):  $\delta$  167.46, 158.85, 158.39, 157.85, 154.93, 139.95, 137.10, 136.09, 129.07, 128.56, 127.82, 124.90, 117.72, 116.91, 116.29, 114.77, 114.63, 114.30, 105.38, 104.78, 54.38, 22.98. Mass spectrometry (ESI-MS, *m/z*): [M - H]<sup>-</sup> calcd for C<sub>26</sub>H<sub>18</sub>N<sub>3</sub>O<sub>3</sub>, 420.1348; found, 420.1354.

### Synthesis of A-DCM-NH<sub>2</sub>

BN-DCM-OH (200 mg, 0.48 mmol), 3-bromoprop-1-yne (115 mg, 0.96 mmol) and K<sub>2</sub>CO<sub>3</sub> (130 mg, 0.96 mmol) were dissolved in dry DMF (15 mL). Then the reaction mixture was stirred overnight at room temperature under an argon atmosphere. The solution was added with DCM (50 mL) and washed with water (50 mL  $\times$  3), dried over Na<sub>2</sub>SO<sub>4</sub>, filtered and evaporated to BN-DCM-A. Mass spectrometry (ESI-MS, *m/z*): [M - H]<sup>-</sup> calcd for C<sub>29</sub>H<sub>20</sub>N<sub>3</sub>O<sub>3</sub>, 458.1505; found, 458.1510. BN-DCM-A were dissolved in conc. HCl and ethanol (2:1, 30 mL). Then the mixture was refluxed for 5 h under an argon atmosphere. The aqueous solution was extracted with ethyl acetate and then the organic layers were dried over Na<sub>2</sub>SO<sub>4</sub>, filtered, and concentrated to obtain the crude product. Then the crude product was purified by silica gel chromatography using dichloromethane/methyl alcohol (v/v, 100:1) as the eluent to afford A-DCM-NH<sub>2</sub> as a red solid (70 mg): Yield 35%. <sup>1</sup>H NMR (400 MHz, DMSO-*d*<sub>6</sub>, ppm)  $\delta$ : 3.64 (s, 1H, alkynyl-H), 4.89 (s, 2H, -NH<sub>2</sub>), 5.93 (s, 2H, -CH<sub>2</sub>-), 6.62 (d, 2H, *J* = 8.4 Hz, ph-H), 6.71 (s, 1H, pyran-H), 6.79 (s, 1H, pyran-H), 7.01 (d, 1H, *J* = 16.0 Hz, alkenyl-H), 7.10 (d, 2H, *J* = 8.4 Hz, ph-H), 7.28 (d, 1H, *J* = 16.0 Hz, alkenyl-H), 7.54 (d, 2H, *J* = 8.4 Hz, ph-H), 7.66 (d, 1H, *J* = 16.0 Hz, alkenyl-H), 7.71 (d, 1H, *J* = 16.0 Hz, alkenyl-H), 7.80 (d, 2H, *J* = 8.4 Hz, ph-H). <sup>13</sup>C NMR (100 MHz, DMSO-*d*<sub>6</sub>, ppm):  $\delta$  167.45, 158.66, 157.83, 154.91, 139.95, 136.95, 136.07, 129.05, 128.54, 127.81, 124.99, 117.70, 116.26, 114.72, 114.61, 114.39, 105.36, 104.79, 80.52, 75.42, 74.85, 54.44. Mass spectrometry (ESI-MS, *m/z*): [M + H]<sup>+</sup> calcd for C<sub>27</sub>H<sub>20</sub>N<sub>3</sub>O<sub>2</sub>, 418.1556; found, 418.1555.

## Synthesis of DCM-S-CPT

To a mixture of A-DCM-NH<sub>2</sub> (100 mg, 0.24 mmol), triphosgene (287 mg, 0.95 mmol) and dry toluene (30 mL) was added DIEA (500 mg, 3.9 mmol) dropwise under an argon atmosphere at room temperature. The resulting solution was refluxed under argon protection for 3 h. After removal of unreacted phosgene gas by flushing argon gas, a solution of CPT-S-OH (253 mg, 0.48 mmol) in CHCl<sub>3</sub> (10 mL) was added to the mixture and the reaction mixture was stirred overnight at room temperature. After removing the solvent under reduced pressure, the crude product was purified by silica gel chromatography using ethyl acetate/PE (v/v, 1:1) as the eluent to afford DCM-S-CPT as a yellow solid (88 mg): Yield 38%. <sup>1</sup>H NMR (400 MHz, CDCl<sub>3</sub>, ppm)  $\delta$ : 1.03 (t,  $J$  = 7.5 Hz, 3H, -CH<sub>3</sub>), 2.10-2.17 (m, 1H, -CH<sub>2</sub>CH<sub>3</sub>), 2.22-2.31 (m, 1H, -CH<sub>2</sub>CH<sub>3</sub>), 2.57 (t,  $J$  = 2.3 Hz, 1H, alkynyl-H), 2.92-3.06 (m, 4H, -CH<sub>2</sub>-S-S-CH<sub>2</sub>-), 4.09-4.15 (m, 1H, -CH<sub>2</sub>), 4.18-4.24 (m, 1H, -CH<sub>2</sub>), 4.39-4.45 (m, 1H, -CH<sub>2</sub>), 4.51-4.57 (m, 1H, -CH<sub>2</sub>), 4.77 (d,  $J$  = 2.3 Hz, 2H, O-CH<sub>2</sub>-), 5.17-5.31 (m, 2H, -NCH<sub>2</sub>-), 5.35 (d,  $J$  = 17.1 Hz, 1H), 5.55 (d,  $J$  = 17.1 Hz, 1H), 6.65 (d,  $J$  = 13.2 Hz, 2H, ph-H), 6.69 (d,  $J$  = 13.2 Hz, 2H, ph-H), 7.35 (s, 1H, ph-H), 7.40 (d,  $J$  = 8.6 Hz, 2H, ph-H), 7.47 (d,  $J$  = 8.4 Hz, 2H, ph-H), 7.50-7.53 (m, 3H, ph-H), 7.57 (d,  $J$  = 8.7 Hz, 2H, ph-H), 7.69 (t,  $J$  = 7.3 Hz, 1H, ph-H), 7.86 (t,  $J$  = 7.1 Hz, 1H, ph-H), 7.96 (d,  $J$  = 8.1 Hz, 1H, ph-H), 8.23 (d,  $J$  = 8.6 Hz, 1H, ph-H), 8.41 (s, 1H, ph-H). <sup>13</sup>C NMR (100 MHz, DMSO-*d*<sub>6</sub>, ppm):  $\delta$  167.45, 165.89, 158.60, 158.33, 157.84, 155.31, 154.91, 151.65, 151.04, 146.72, 145.09, 143.58, 139.96, 136.95, 136.09, 130.41, 129.25, 129.04, 128.59, 127.82, 127.34, 126.84, 126.57, 125.03, 118.02, 117.72, 116.90, 116.25, 114.72, 114.60, 114.42, 105.36, 104.79, 93.21, 80.25, 76.72, 76.41, 65.29, 65.16, 58.13, 54.46, 53.74, 49.14, 39.96, 29.17, 6.41. Mass spectrometry (ESI-MS, *m/z*): [M + H]<sup>+</sup> calcd for C<sub>53</sub>H<sub>42</sub>N<sub>5</sub>O<sub>10</sub>S<sub>2</sub>, 972.2373; found, 972.2373.

## Synthesis of BP<sub>5</sub>-DCM-S-CPT

To a mixture of DCM-S-CPT (30 mg, 0.031 mmol), Biotin-PEG<sub>5</sub>-N<sub>3</sub> (25 mg, 0.046 mmol) and dry DMF (2 mL) was added CuI (12 mg, 0.060 mmol) dropwise under an argon atmosphere at room temperature. Then the reaction mixture was stirred overnight at room temperature. The solution was added with DCM (20 mL) and washed with water (20 mL  $\times$  5), dried over Na<sub>2</sub>SO<sub>4</sub>, filtered and evaporated to dryness. Then the crude product was purified by silica gel chromatography using dichloromethane/methyl alcohol (v/v, 10:1) as the eluent to afford BP<sub>5</sub>-DCM-S-CPT as a yellow solid (12 mg): Yield 26%. <sup>1</sup>H NMR (400 MHz, CDCl<sub>3</sub>, ppm)  $\delta$ : 8.43 (s, 1H, ph-H), 8.25 (d,  $J$  = 8.5 Hz, 1H, ph-H), 7.97 (t,  $J$  = 8.1 Hz, 1H, ph-H), 7.87 (t,  $J$  = 7.2 Hz, 1H, ph-H), 7.73 (s, 1H, ph-H), 7.70 (t,  $J$  = 7.5 Hz, 1H, ph-H), 7.85 (d,  $J$  = 7.0 Hz, 2H, ph-H), 7.53 (d,  $J$  = 8.3 Hz, 3H, ph-H), 7.48 (d,  $J$  = 6.7 Hz, 2H, ph-H), 7.44 (d,  $J$  = 8.3 Hz, 2H, ph-H), 7.36 (s, 1H, ph-H), 7.13 (d,  $J$  = 8.7 Hz, 1H, ph-H), 7.10 (d,  $J$  = 8.4 Hz, 1H, ph-H), 6.76-6.66 (m, 4H, ph-H), 5.63 (d,  $J$  = 17.1 Hz, 1H, alkene-H), 5.37 (d,  $J$  = 17.1 Hz, 1H, alkene-H), 5.33-5.22 (m, 4H, ph-H), 4.61-4.60 (m, 2H, -CH<sub>2</sub>), 4.56-4.51 (m, 2H, -CH<sub>2</sub>), 4.46-4.40 (m, 1H, -CH), 4.35-4.31 (m, 1H, -CH), 4.25-4.16 (m, 2H, -S-CH<sub>2</sub>), 4.00-3.90 (m, 2H, -CH<sub>2</sub>), 3.68-3.56 (m, 16H, -O-CH<sub>2</sub>), 3.48-3.40 (m, 4H, -CH<sub>2</sub>), 3.04-2.91 (m, 6H, -CH<sub>2</sub>), 2.74 (d,  $J$  = 12.7 Hz, 1H, -CH), 2.31-2.14 (m, 4H, -CH<sub>2</sub>), 1.70-1.67 (m, 4H, -CH<sub>2</sub>), 1.48-1.45 (m, 2H, -CH<sub>2</sub>), 1.04 (t, 3H,  $J$  = 7.3 Hz, -CH<sub>3</sub>). <sup>13</sup>C NMR (100 MHz, DMSO-*d*<sub>6</sub>, ppm):  $\delta$  170.97, 167.46, 165.89, 161.57, 158.60, 158.30, 157.80, 155.30, 154.87, 151.66, 151.01, 146.72, 145.08, 143.59, 139.96, 136.92, 136.06, 130.40, 129.24, 129.03, 128.55, 127.80, 127.33, 126.83, 126.55, 125.02, 118.01, 117.71, 116.90, 116.22, 114.71, 114.59, 114.39, 105.34, 104.78, 93.21, 76.72, 68.64, 68.57, 68.55, 68.42, 68.10, 68.02, 65.16, 59.89, 58.13, 58.05, 54.48, 54.28, 48.84, 39.95, 37.30, 35.01, 33.94, 29.17, 27.04, 26.88, 24.11, 22.98, 6.41. Mass spectrometry (ESI-MS, *m/z*): [M + H]<sup>+</sup> calcd for C<sub>75</sub>H<sub>82</sub>N<sub>11</sub>O<sub>17</sub>S<sub>3</sub>, 1504.5052; found, 1504.5049.

## Synthesis of BP<sub>20</sub>-DCM-S-CPT

To a mixture of DCM-S-CPT (30 mg, 0.031 mmol), Biotin-PEG<sub>20</sub>-N<sub>3</sub> (54 mg, 0.046 mmol) and dry DMF (2 mL) was added CuI (12 mg, 0.060 mmol) dropwise under an argon atmosphere at room temperature. Then the reaction mixture was stirred overnight at room temperature. The solution was added with DCM (20 mL) and washed with water (20 mL × 5), dried over Na<sub>2</sub>SO<sub>4</sub>, filtered and evaporated to dryness. Then the crude product was purified by silica gel chromatography using dichloromethane/methyl alcohol (v/v, 10:1) as the eluent to afford BP<sub>20</sub>-DCM-S-CPT as a yellow solid (20 mg): Yield 30%. <sup>1</sup>H NMR (400 MHz, CDCl<sub>3</sub>, ppm) δ: 8.42 (s, 1H, ph-H), 8.23 (d, *J* = 8.6 Hz, 1H, ph-H), 7.96 (d, *J* = 8.0 Hz, 1H, ph-H), 7.91 (s, 1H, ph-H), 7.86 (t, *J* = 6.9 Hz, 1H, ph-H), 7.69 (t, *J* = 7.1 Hz, 1H, ph-H), 7.63 (d, *J* = 6.5 Hz, 1H, ph-H), 7.58-7.55 (m, 2H, ph-H), 7.53-7.51 (m, 3H, ph-H), 7.47 (d, *J* = 5.9 Hz, 2H, ph-H), 7.42 (d, *J* = 8.5 Hz, 2H, ph-H), 7.35 (s, 1H, ph-H), 7.12 (d, *J* = 8.8 Hz, 1H, ph-H), 7.09 (d, *J* = 8.8 Hz, 1H, ph-H), 6.70 (d, *J* = 13.9 Hz, 1H, alkene-H), 6.67 (s, 2H, ph-H), 6.66 (d, *J* = 11.6 Hz, 1H, alkene-H), 5.61 (d, *J* = 17.1 Hz, 1H, alkene-H), 5.36 (d, *J* = 17.0 Hz, 1H, alkene-H), 5.28-5.19 (m, 4H, ph-H), 4.60-4.55 (m, 2H, -CH<sub>2</sub>), 4.53-4.49 (m, 2H, -CH<sub>2</sub>), 4.45-4.39 (m, 1H, -CH), 4.34-4.31 (m, 1H, -CH), 4.26-4.12 (m, 2H, -S-CH<sub>2</sub>), 3.97 (t, *J* = 5.8 Hz, 1H, -CH), 3.89 (t, *J* = 5.0 Hz, 1H, -CH), 3.65-3.62 (m, 76 H, -O-CH<sub>2</sub>), 3.56 (t, *J* = 5.1 Hz, 4H, -CH<sub>2</sub>), 3.45 (t, *J* = 5.2 Hz, 4H, -CH<sub>2</sub>), 3.18-3.13 (m, 1 H, -CH), 3.02-2.90 (m, 5 H, -CH<sub>2</sub>), 2.73 (d, *J* = 12.7 Hz, 1H, -CH), 2.34-2.12 (m, 4H, -CH<sub>2</sub>), 1.72-1.60 (m, 4H, -CH<sub>2</sub>), 1.49-1.40 (m, 2H, -CH<sub>2</sub>), 1.03 (t, *J* = 7.4 Hz, 3H, -CH<sub>3</sub>). <sup>13</sup>C NMR (100 MHz, DMSO-*d*<sub>6</sub>, ppm): δ 168.58, 167.01, 162.67, 159.73, 159.45, 158.96, 156.43, 156.02, 152.77, 152.15, 147.84, 146.21, 144.71, 141.08, 138.07, 137.21, 131.54, 130.38, 130.16, 129.70, 129.66, 128.94, 128.46, 127.96, 127.70, 126.15, 119.14, 118.83, 117.36, 115.84, 115.71, 115.52, 106.47, 105.91, 94.33, 77.84, 69.75, 69.54, 69.23, 69.15, 66.27, 61.00, 59.25, 59.16, 55.58, 55.40, 49.96, 41.07, 38.41, 36.13, 35.05, 30.28, 28.16, 28.01, 25.23, 24.09, 7.53. Mass spectrometry (ESI-MS, *m/z*): [M + H]<sup>+</sup> calcd for C<sub>105</sub>H<sub>142</sub>N<sub>11</sub>O<sub>32</sub>S<sub>3</sub>, 2164.8985; found, 2164.8990.

## Preparation of BP<sub>20</sub>-DCM-S-CPT Nanoparticles

In a typical procedure for the preparation of BP<sub>20</sub>-DCM-S-CPT nanoparticles: 10 mg BP<sub>20</sub>-DCM-S-CPT was dissolved in 1.0 mL of DMSO and stirred at room temperature (25 °C) for 10 min. Then the mixture was slowly added into 9.0 mL of deionized water and stirred slightly for another 10 min. Subsequently, the solution was dialyzed against deionized water for 24 h (molecular weight cutoff = 1,000 g mol<sup>-1</sup>) and the deionized water was exchanged for 4 times.

## Drug Loading Calculations

The drug loading of the drug amphiphiles is given as the CPT weight as a percentage of the total molecular weight:

$$\text{Drug loading (\%)} = \frac{347.1}{M_{DA}} \times 100 \%$$

where  $M_{DA}$  is the exact mass of the prodrugs.

$$\text{DCM - CPT Drug loading (\%)} = \frac{347.1}{972.2} \times 100 \% = 35.7 \%$$

$$\text{BP}_5\text{-DCM - CPT Drug loading (\%)} = \frac{347.1}{1504.5} \times 100 \% = 23.1 \%$$

$$\text{BP}_{20}\text{-DCM - CPT Drug loading (\%)} = \frac{347.1}{2164.9} \times 100 \% = 16.0 \%$$

**Table S1.** Molecular Weights, Drug Loading Content, Water Solubility, Concerted Targeting and Nanostructure of Amphiphilic Prodrugs

| Amphiphilic Prodrugs        | $M_{\text{HRMS}}$ (Da) <sup>a</sup> | DLC/% <sup>b</sup> | Water Solubility | Activatable Targeting | Active Targeting | Passive Targeting | Nanostructure                             |
|-----------------------------|-------------------------------------|--------------------|------------------|-----------------------|------------------|-------------------|-------------------------------------------|
| DCM-S-CPT                   | 972.2373                            | 35.7               | -                | √                     | -                | -                 | -                                         |
| BP <sub>5</sub> -DCM-S-CPT  | 1504.5049                           | 23.1               | √                | √                     | √                | -                 | Cannot form stable self-assemblies        |
| BP <sub>20</sub> -DCM-S-CPT | 2164.8990                           | 16.0               | √                | √                     | √                | √                 | Highly Stable self-assemblies (ca. 80 nm) |

<sup>a</sup>Molecular weights  $M_{\text{HRMS}}$  were evaluated by high resolution mass spectrometry. <sup>b</sup>Drug loading content (DLC) was calculated as the ratio of exact molecular weight of CPT to the exact molecular weight of amphiphilic prodrugs.

## Transmission Electron Microscopy (TEM) Protocol

All 10  $\mu\text{M}$  sample solutions were prepared from a stock solution of 1 mM in water. Samples were aged overnight prior to sample preparation. Samples were prepared by depositing 10  $\mu\text{L}$  of the appropriate solution onto a carbon-coated copper grid (Electron Microscopy Services, Hatfield, PA), wicking away the excess solution with a small piece of filter paper. The sample grid was then allowed to dry at room temperature (25 °C) prior to imaging. TEM imaging was performed on a JEOL 100CX transmission electron microscope operating at an accelerating bias voltage of 100 kV.

## CMC Measurements

Critical micelle concentration (CMC) value is the amphiphilic prodrugs concentration at which micelles would form in solution. CMC of BP<sub>20</sub>-DCM-S-CPT in the 0.2 M sodium phosphate buffer at pH 7.4. First, the stock solution (5 mg/ml) was diluted to different concentrations with the same buffer. In each solution, 5  $\mu\text{L}$  pyrene in THF solution ( $2 \times 10^{-4}$  M) was added to 2 ml BP<sub>20</sub>-DCM-S-CPT solution to produce the final pyrene concentration at  $5 \times 10^{-7}$  M. The fluorescence spectra were recorded with the excitation wavelength of 339 nm and the excitation. The  $I_1$  and  $I_3$  values were measured as the maximum emission intensity at ca. 372 and 382 nm, respectively.

I<sub>3</sub>/I<sub>1</sub> ratio was plotted as a function of polymer concentration. I<sub>3</sub>/I<sub>1</sub> ratio reflects the polarity of the pyrene environment where partition of pyrene in the hydrophobic micelle core leads to increased I<sub>3</sub>/I<sub>1</sub> values.

## Cell Experiment

### Cell Lines

The human hepatocyte QSG-7701 cell line, human hepatoma SMMC-7721 cell line and human epithelioid cervical carcinoma cell line HeLa were purchased from the Institute of Cell Biology (Shanghai, China). Cells were all propagated in T-75 flasks cultured at 37 °C under a humidified 5% CO<sub>2</sub> atmosphere in RPMI-1640 medium or DMEM medium (GIBCO/Invitrogen, Camarillo, CA, USA), which were supplemented with 10 % fetal bovine serum (FBS, Biological Industry, Kibbutz Beit Haemek, Israel) and 1 % penicillin-streptomycin (10,000 U mL<sup>-1</sup> penicillin and 10 mg/ml streptomycin, Solarbio life science, Beijing, China).

### *In Vitro* Cytotoxicity Assay

The cell cytotoxicity of DCM-S-CPT, BP<sub>5</sub>-DCM-S-CPT and BP<sub>20</sub>-DCM-S-CPT to QSG-7701 cells, SMMC-7721 cells and HeLa cells were measured by 3-(4, 5-dimethylthiazol-2-yl)-2, 5-diphenyltetrazolium bromide (MTT) assay. The cytotoxicity was evaluated by Cell Counting Kit-8 (Dojindo, Tokyo, Japan) according to the factory's instruction. Cells were plated in 96-well plates in 0.1 mL volume of DMEM or RPMI-1640 medium with 10 % FBS, at a density of 1×10<sup>4</sup> cells/well and added with desired concentrations of DCM-S-CPT, BP<sub>5</sub>-DCM-S-CPT and BP<sub>20</sub>-DCM-S-CPT. After incubation for 24 h, absorbance was measured at 450 nm with a Tecan GENios Pro multifunction reader (Tecan Group Ltd., Maennedorf, Switzerland). Each concentration was measured in triplicate and used in three independent experiments. The relative cell viability was calculated by the equation: cell viability (%) = (OD<sub>treated</sub>/OD<sub>control</sub>) × 100%

### *In Vitro* Cytotoxicity Assay Pre-Treated with GSH

Cells were plated in 96-well plates in 0.1 mL volume of DMEM or RPMI-1640 medium with 10 % FBS, at a density of 1×10<sup>4</sup> cells/well and added with desired concentrations of GSH. After incubation for 3 h, PBS (pH 7.4) was used to washed cells for three times to clean the extracellular GSH. Then the cells were exposed to desired concentrations of DCM-S-CPT, BP<sub>5</sub>-DCM-S-CPT and BP<sub>20</sub>-DCM-S-CPT for 24 h with complete medium. After incubation for 24 h, absorbance was measured at 450 nm with a Tecan GENios Pro multifunction reader (Tecan Group Ltd., Maennedorf, Switzerland). Each concentration was measured in triplicate and used in three independent experiments. The relative cell viability was calculated by the equation: cell viability (%) = (OD<sub>treated</sub>/OD<sub>control</sub>) × 100%

### Measurement of Intracellular GSH Levels

To measure the intracellular glutathione (GSH) concentration, QSG-7701 cells, SMMC-7721 cells pre-treated with and without GSH were cultured and prepared. The intracellular GSH from cell extract can react with DTNB (5,5-dithio-bis-[2-nitrobenzenic acid]) to form the coloured GSH-DTNB conjugate, which can be determined by the change in absorbance at 412 nm.

### *In Vitro* Cellular Imaging

The QSG-7701 cells and SMMC-7721 cells at 1×10<sup>5</sup> cells/well were seeded onto glass-bottom petri dishes with complete medium (1.5 mL) for 12 h. Then the cells pre-incubated with and without GSH were exposed to desired concentrations of DCM-S-CPT, BP<sub>5</sub>-DCM-

S-CPT and BP<sub>20</sub>-DCM-S-CPT for 3 h. PBS (pH 7.4) was used to wash cells for three times to clean the background. 4 % paraformaldehyde was added at room temperature for 20 min. The fixed cells were rinsed with PBS (pH 7.4) twice. The images were then photographed by using a Nikon A1R confocal laser scanning microscope with 488 nm as the excitation wavelength and 650-700 nm as the emission wavelength.

## GSH-Dependent Intracellular Fluorescent Release by Flow Cytometry Assay

The HeLa cells at  $2 \times 10^5$  cells/well were seeded onto six-well plates with 2 mL complete medium and cultured overnight. The cells were then treated with the designed concentrations of Biotin, DCM-S-CPT, BP<sub>5</sub>-DCM-S-CPT and BP<sub>20</sub>-DCM-S-CPT at 37°C for 2 h, 3h, 6 h or 12 h. After washed with PBS twice, the cells were harvested using 0.05 % (w/v) trypsin/0.02 % (w/v) EDTA. The collected cells were resuspended in PBS (500  $\mu$ L) after washed with cold PBS twice. Each sample was measured with flow cytometry (FACSCalibur) within 1 h ( $\lambda_{ex}$  = 488 nm, 680/20 nm bandpass filter).

## Animals

All animal studies were approved by the Animal Care and Use Committee of Shanghai Institute of Materia Medica in accordance with the guidelines for the care and use of laboratory animals. The 3-4-week-old female BALB/cA nude mice were produced from Shanghai Institute of Materia Medica, Chinese Academy of Sciences, and maintained under standard conditions. The animals were housed in sterile cages within laminar airflow hoods in a specific pathogen-free room with a 12-h light/12-h dark schedule and fed autoclaved chow and water *ad libitum*. Number of qualitative qualification: No.311613700000141. Production Permit No.: SCXK (Shanghai) 2013-0017. SYXK No. of Shanghai Institute of Materia Medica: SYXK (Shanghai) 2013-0049.

## Real-Time *in Vivo* Imaging in Tumor-Bearing Mice

The nude mice were inoculated with HeLa cell on their right flanks by injecting  $10^6$  cells subcutaneously. When the tumors grew up to 10 mm in diameter, DCM-S-CPT, BP<sub>5</sub>-DCM-S-CPT and BP<sub>20</sub>-DCM-S-CPT (administered at a CPT-equivalent dose of 0.1 mg/kg) in PBS were intravenously injected via tail vein into the HeLa cell tumor-bearing nude mice. The real-time *in vivo* imaging *in vivo* imaging was recorded at different time intervals after DCM-S-CPT, BP<sub>5</sub>-DCM-S-CPT and BP<sub>20</sub>-DCM-S-CPT injection using PerkinElmer IVIS Lumina Kinetic Series III imaging system. The concentration of the injected solution is 3  $\mu$ M (PBS, pH = 7.4). In the *in vivo* imaging,  $\lambda_{ex}$  = 470 nm,  $\lambda_{em}$  = 650 nm. After injection, the mice were sacrificed at 24 h. The grafted tumor tissues and major organs, including kidney, lung, spleen, liver, and heart, were excised and washed with 0.9% saline. The optical images of the organs and tissues were taken using a PE *in vivo* Professional Imaging System as described above.

## *In Vivo* Antitumor Studies

To develop the human tumor xenografts, HeLa cells were implanted into the right flanks of mice ( $5.0 \times 10^6$  cells). When the tumors reached a mean volume of around 90-100 mm<sup>3</sup>, mice were randomly assigned to five treatment groups (n = 6/group): (a) PBS, (b) camptothecin (CPT) at 10 mg/kg, (c) DCM-S-CPT, (d) BP<sub>5</sub>-DCM-S-CPT and (e) BP<sub>20</sub>-DCM-S-CPT at equivalent dose of 10 mg/kg CPT. The mice were intravenously injected with PBS, CPT, DCM-S-CPT, BP<sub>5</sub>-DCM-S-CPT and BP<sub>20</sub>-DCM-S-CPT via the tail vein every 3 days, repeated for 3 weeks. Each animal was earmarked and followed individually throughout the experiment. Tumor volume

(mm<sup>3</sup>) was calculated by  $V \text{ (mm}^3\text{)} = 1/2 \times A \text{ (mm)} \times B \text{ (mm)}^2$ , where A and B were respectively the longest and widest diameters of tumor. The curve of tumor growth was drawn based on tumor volume (mm<sup>3</sup>) and corresponding time (days). Animals were sacrificed after the 3 weeks treatment according to institutional guidelines. Tumors were resected, weighed. To evaluate the therapeutic efficacy of the treatment, inhibition rates (IRT) of tumor growth were calculated using the following equation:  $IRT = 100 \% \times (\text{mean tumor weight of control group} - \text{mean tumor weight of experimental group}) / \text{mean tumor weight of control group}$ .

## 2. Stability of BP<sub>20</sub>-DCM-S-CPT

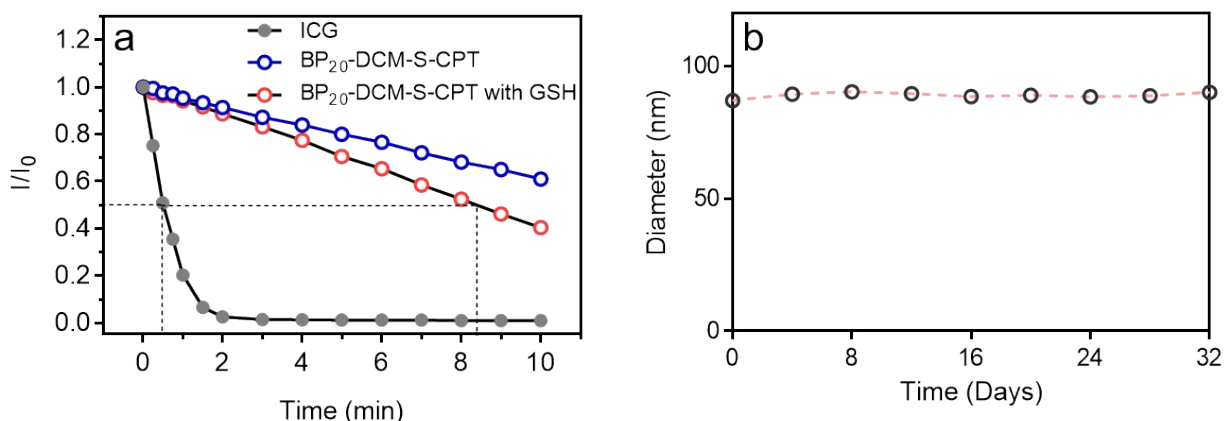

**Fig. S1** (a) Time-dependent fluorescence intensity of ICG (10  $\mu$ M, monitored at 812 nm), BP<sub>20</sub>-DCM-S-CPT (10  $\mu$ M, treated with 2.5 mM GSH for 1 h at 37 °C, monitored at 650 nm), and BP<sub>20</sub>-DCM-S-CPT (10  $\mu$ M, monitored at 650 nm) under illumination. (b) BP<sub>20</sub>-DCM-S-CPT self-assemblies remain stable in PBS (pH 7.4) over 32 days at 37 °C.

The photostability of NIR fluorophores in drug delivery systems is a crucial element for practical application in bioimaging *in vivo*. The time-dependent fluorescence measurements were conducted for the photostability of GSH treated BP<sub>20</sub>-DCM-S-CPT upon continuous illumination (Hamamatsu, LC8 Lightningcure, 300 W), and compared with cyanine dye ICG (the FDA-approved NIR contrast agent). After exposure for about 100 s, the fluorescence of ICG decreased sharply to approximate 5% of the initial value (monitored at 812 nm), indicative of the almost complete decomposition of the scaffold of ICG, while for BP<sub>20</sub>-DCM-S-CPT in the presence of GSH, more than 80% of the original fluorescence at 650 nm survived. Obviously, BP<sub>20</sub>-DCM-S-CPT on treatment with GSH as well as production of BP<sub>20</sub>-DCM-NH<sub>2</sub> exhibited much better photostability than ICG. As calculated from the time-course fluorescence measurements, the fluorescence half-life of BP<sub>20</sub>-DCM-S-CPT (~505 s) is 19-fold longer than that of ICG (~27 s). The high photostability of BP<sub>20</sub>-DCM-S-CPT indicates that it can be used as an excellent contrast agent for *in vivo* bioimaging.

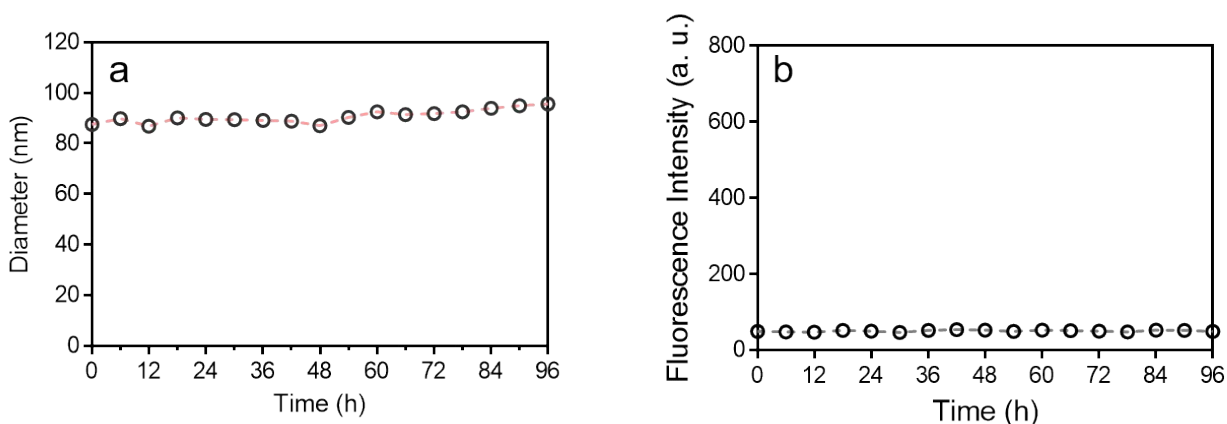

**Fig. S2** (a) Time dependence of diameter of BP<sub>20</sub>-DCM-S-CPT in blood serum over 4 days at 37 °C. (b) Fluorescence intensity at 650 nm of BP<sub>20</sub>-DCM-S-CPT self-assemblies remain stable in fresh human serum over 4 days at 37 °C.

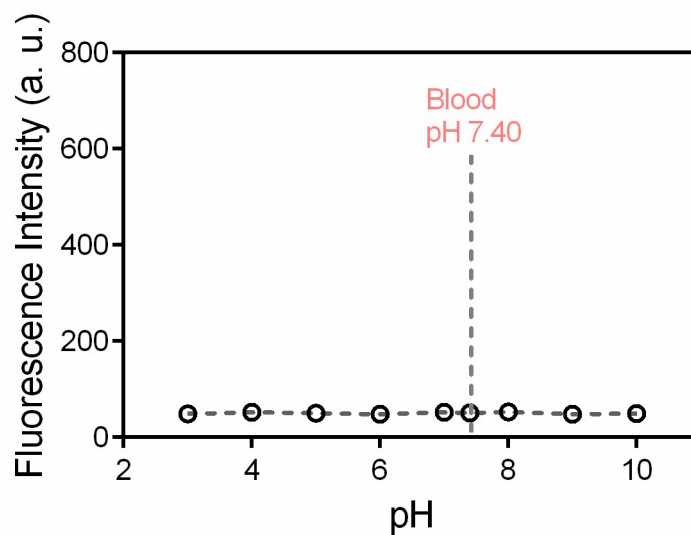

**Fig. S3** Fluorescence intensity at 650 nm of BP<sub>20</sub>-DC M-S-CPT self-assemblies as a function of pH value at 37 °C.

### 3. TEM Image of BP<sub>5</sub>-DCM-S-CPT and BP<sub>20</sub>-DCM-S-CPT & GSH

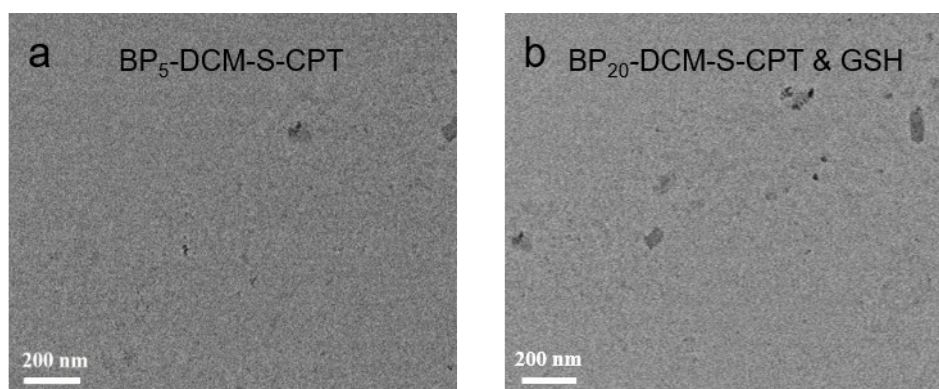

**Fig. S4** (a) TEM image of BP<sub>5</sub>-DCM-S-CPT at 10  $\mu$ M in water. BP<sub>5</sub>-DCM-S-CPT cannot form stable self-assemblies. (b) TEM image of BP<sub>20</sub>-DCM-S-CPT treated with GSH (2.5 mM GSH for 2 h).

#### 4. Proposed Mechanism of BP<sub>n</sub>-DCM-S-CPT Reaction with GSH

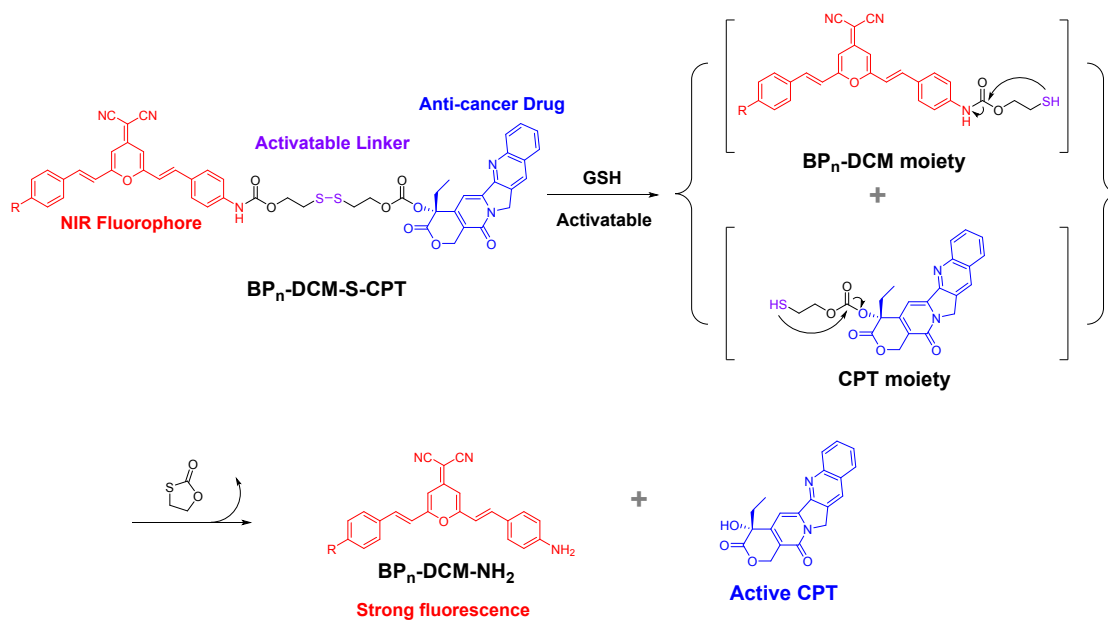

**Scheme S2** Proposed mechanism in CPT activation and fluorescent variation of the prodrug BP<sub>n</sub>-DCM-S-CPT by the treatment of GSH.

#### 5. ESI-MS Spectra Characterization of DCM-S-CPT Reaction with GSH

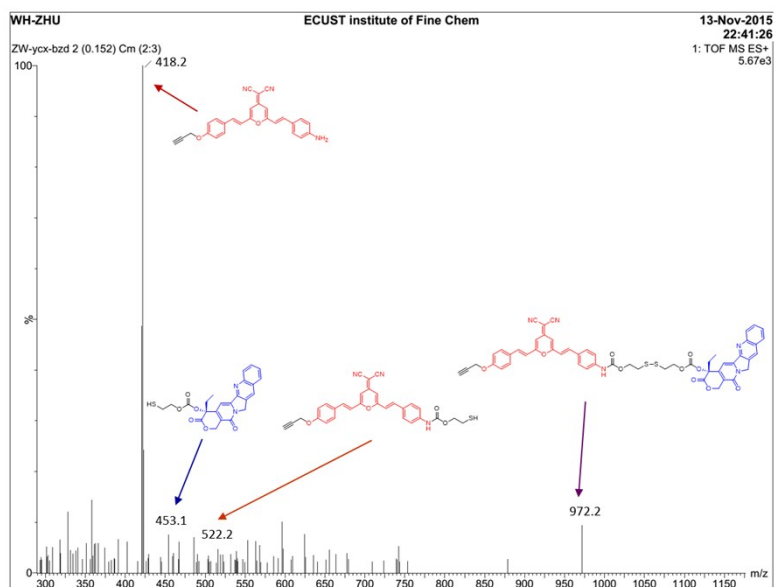

**Fig. S5** HRMS spectrum of the products from the reaction of DCM-S-CPT with 20 equiv of GSH. Spectrum was obtained 1 h after exposure at 37°C.

## 6. Effect of Self-Assembled Nanostructure Formation on GSH-Induced Drug Release

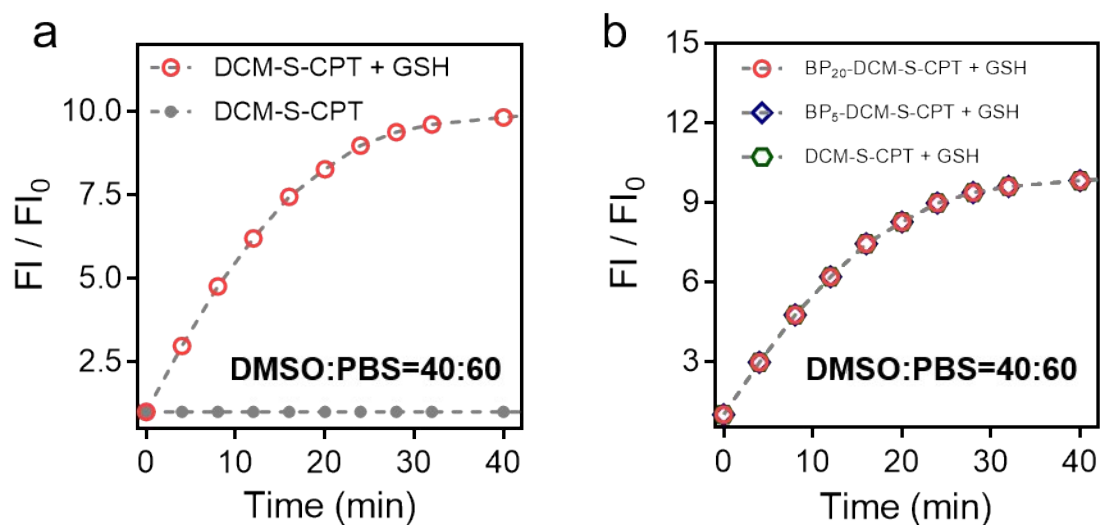

**Fig. S6** (a) Time dependence of fluorescence intensity at 650 nm for DCM-S-CPT (10  $\mu$ M) with and without GSH (2.5 mM) in DMSO/PBS buffer solution (40/60, v/v, pH = 7.4) at 37°C. (b) Time dependence of fluorescence intensity at 650 nm for DCM-S-CPT BP<sub>5</sub>-DCM-S-CPT and BP<sub>20</sub>-DCM-S-CPT (10  $\mu$ M) with (2.5 mM) in DMSO/PBS buffer solution (40/60, v/v, pH = 7.4) at 37°C.

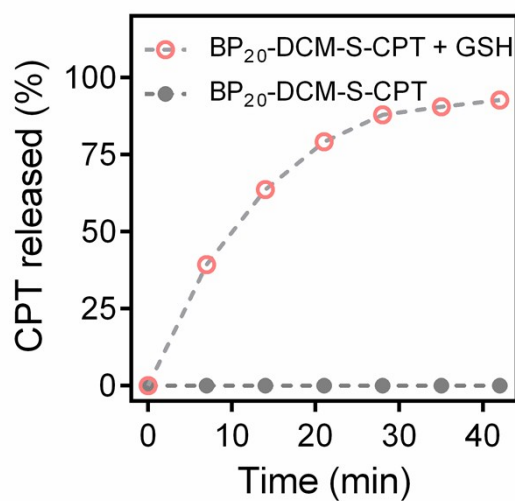

**Fig. S7** CPT released from BP<sub>20</sub>-DCM-S-CPT (in DMSO/PBS buffer solution, 40/60, v/v, pH = 7.4) as a function of time with and without GSH (2.5 mM) in HPLC chromatograms.

## 7. HPLC Chromatogram of BP<sub>20</sub>-DCM-S-CPT

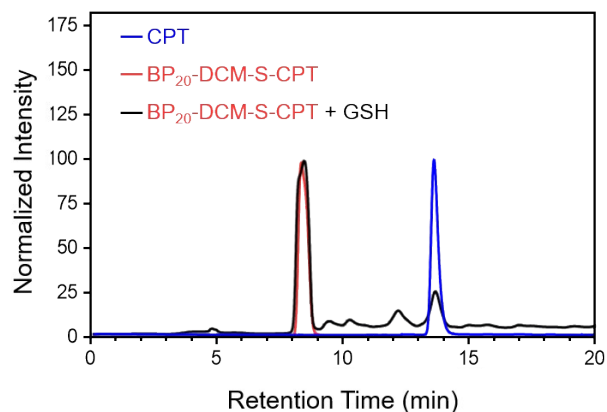

**Fig. S8** HPLC analysis of GSH-driven drug release of BP<sub>20</sub>-DCM-S-CPT at 10 min by monitoring the UV/Vis absorption at 254 nm. The retention time of BP<sub>20</sub>-DCM-S-CPT and CPT is 8.19 min and 13.63 min respectively

## 8. Selectivity of BP<sub>20</sub>-DCM-S-CPT

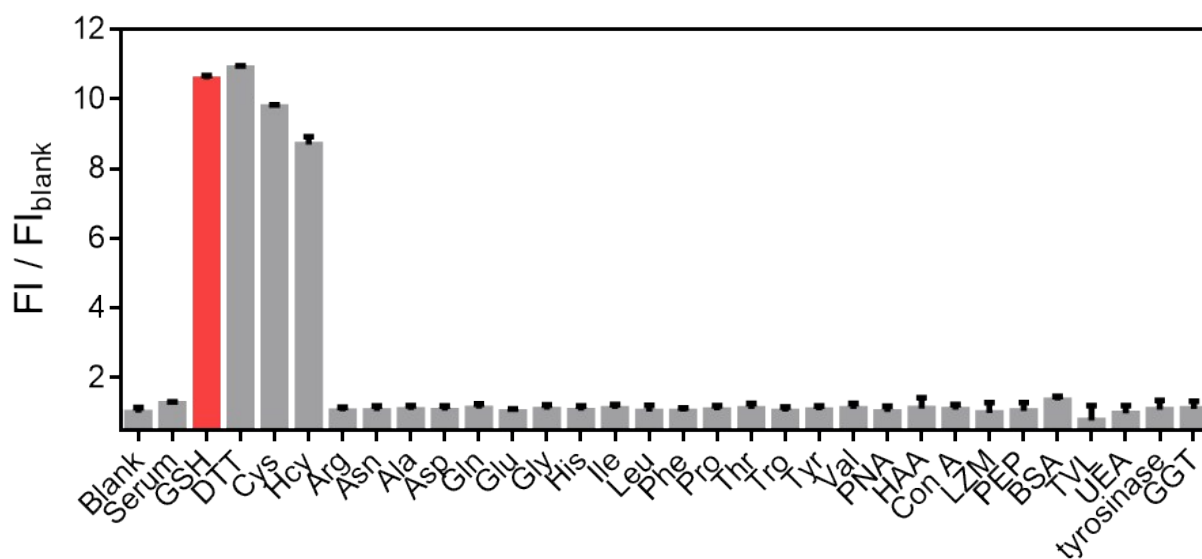

**Fig. S9** Fluorescence responses ( $I_{650}$  nm) of BP<sub>20</sub>-DCM-S-CPT toward various amino acids, enzymes and serum markers including GSH, DTT, Cys, Hcy, Arg, Asn, Ala, Asp, Gln, Glu, Gly, His, Ile, Leu, Phe, Pro, Thr, Tro, Tyr, Val, PNA (peanut agglutinin), HAA (snailagglutinin), Con A (concanavalin A), LZM (lysozyme), PEP (pepsin), BSA (bovine albumin), TVL (triticum vulgaris lectin), UEA (ulex europaeus lectin), tyrosinase, GGT (gamma-glutamyl transpeptidase)

## 9. Cytotoxicity of DCM-S-CPT, BP<sub>5</sub>-DCM-S-CPT and BP<sub>20</sub>-DCM-S-CPT

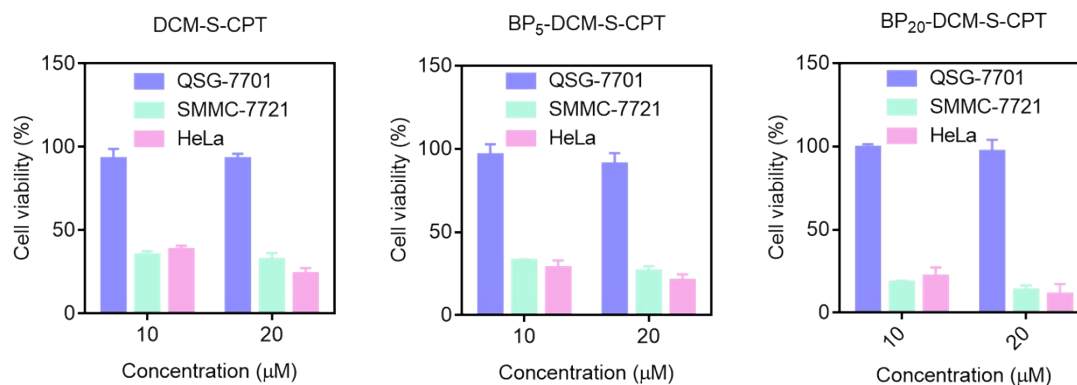

**Fig. S10** *In vitro* dose-response relationship study of DCM-S-CPT (a), BP<sub>5</sub>-DCM-S-CPT (b) and BP<sub>20</sub>-DCM-S-CPT (c) on human hepatocyte QSG-7701 cells, human hepatoma SMMC-7721 cells and human epithelioid cervical carcinoma HeLa cells for 24 h.

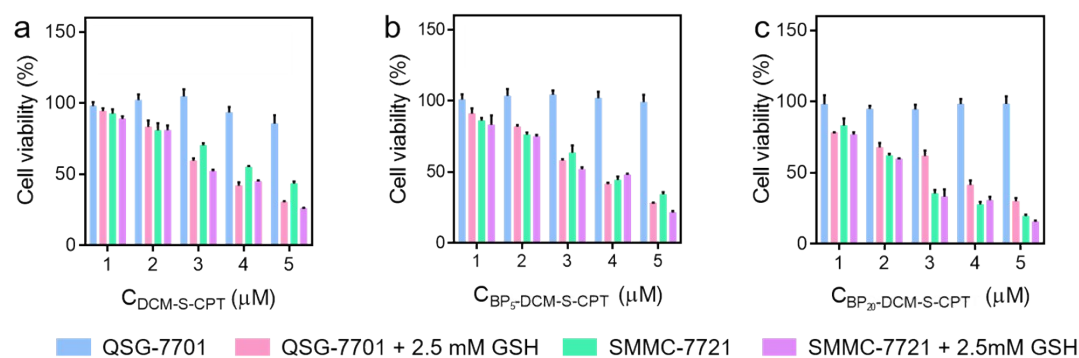

**Fig. S11** *In vitro* dose-response relationship study of DCM-S-CPT (a), BP<sub>5</sub>-DCM-S-CPT (b) and BP<sub>20</sub>-DCM-S-CPT (c) with and without extra GSH (2.5 mM) on human hepatocyte QSG-7701 cells and human hepatoma SMMC-7721 cells for 24 h.

## 10. Confocal Laser Scanning Microscopy Images of HeLa Cells

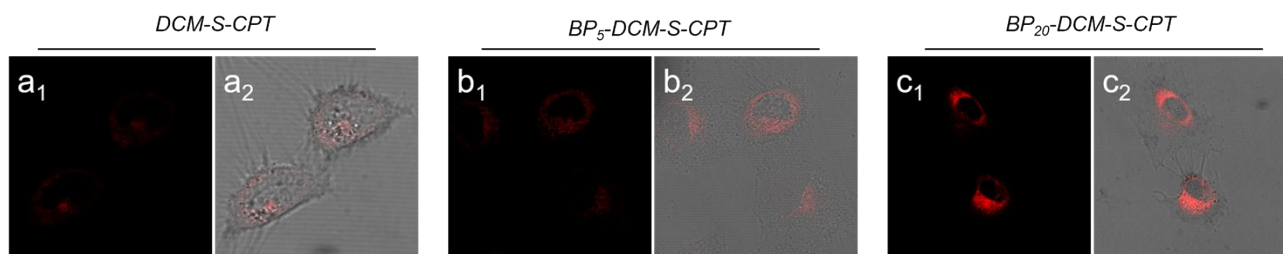

**Fig. S12** Confocal laser scanning microscopy images ( $\lambda_{\text{ex}} = 488 \text{ nm}$ ,  $\lambda_{\text{em}} = 650\text{-}700 \text{ nm}$ ) of HeLa cells incubated with DCM-S-CPT (a), BP<sub>5</sub>-DCM-S-CPT (b) and BP<sub>20</sub>-DCM-S-CPT (c). Channel 1: Fluorescence signal of activated prodrugs; Channel 2: Overlapped field.

## 11. Antitumor Activity of DCM-S-CPT, BP<sub>5</sub>-DCM-S-CPT and BP<sub>20</sub>-DCM-S-CPT

**Table S2** Changes of tumor volume of HeLa xenograft tumor-bearing mice after intravenous injection of PBS, CPT, DCM-S-CPT, BP<sub>5</sub>-DCM-S-CPT and BP<sub>20</sub>-DCM-S-CPT administered at a CPT-equivalent dose of 10 mg/kg every 3 days; each tumor was measured at the time of the injection and its relative tumor volume was calculated.

|                             | No. | Tumor Volume (mm <sup>3</sup> ) |     |     |      |      |      |      |
|-----------------------------|-----|---------------------------------|-----|-----|------|------|------|------|
|                             |     | d0                              | d4  | d7  | d11  | d14  | d18  | d21  |
| PBS                         | 1   | 87                              | 148 | 411 | 690  | 893  | 1238 | 1558 |
|                             | 2   | 91                              | 208 | 515 | 747  | 767  | 1337 | 1683 |
|                             | 3   | 104                             | 239 | 403 | 522  | 628  | 1167 | 1363 |
|                             | 4   | 81                              | 156 | 377 | 865  | 1201 | 1474 | 1880 |
|                             | 5   | 88                              | 214 | 463 | 909  | 1368 | 1616 | 2166 |
|                             | 6   | 107                             | 266 | 646 | 1013 | 1540 | 2129 | 2077 |
| CPT                         | 1   | 83                              | 141 | 269 | 531  | 734  | 837  | 882  |
|                             | 2   | 87                              | 138 | 264 | 459  | 619  | 700  | 760  |
|                             | 3   | 90                              | 111 | 171 | 471  | 438  | 1041 | 1127 |
|                             | 4   | 99                              | 126 | 190 | 266  | 370  | 470  | 454  |
|                             | 5   | 103                             | 313 | 306 | 399  | 454  | 1283 | 1085 |
|                             | 6   | 127                             | 161 | 306 | 540  | 690  | 1150 | 895  |
| DCM-S-CPT                   | 1   | 78                              | 116 | 119 | 125  | 146  | 155  | 192  |
|                             | 2   | 86                              | 127 | 216 | 241  | 257  | 293  | 467  |
|                             | 3   | 88                              | 89  | 71  | 67   | 78   | 85   | 101  |
|                             | 4   | 101                             | 130 | 167 | 140  | 256  | 192  | 266  |
|                             | 5   | 106                             | 156 | 214 | 271  | 297  | 472  | 698  |
|                             | 6   | 124                             | 140 | 130 | 167  | 157  | 199  | 265  |
| BP <sub>5</sub> -DCM-S-CPT  | 1   | 74                              | 120 | 124 | 100  | 92   | 82   | 96   |
|                             | 2   | 85                              | 79  | 85  | 81   | 66   | 55   | 54   |
|                             | 3   | 95                              | 94  | 97  | 86   | 92   | 77   | 112  |
|                             | 4   | 100                             | 119 | 167 | 152  | 123  | 75   | 53   |
|                             | 5   | 106                             | 132 | 155 | 185  | 113  | 69   | 102  |
|                             | 6   | 125                             | 162 | 153 | 151  | 110  | 107  | 96   |
| BP <sub>20</sub> -DCM-S-CPT | 1   | 76                              | 79  | 47  | 16   | 17   | 0    | 0    |
|                             | 2   | 88                              | 78  | 44  | 24   | 20   | 0    | 0    |
|                             | 3   | 89                              | 83  | 39  | 23   | 20   | 12   | 0    |
|                             | 4   | 101                             | 77  | 61  | 31   | 20   | 11   | 0    |
|                             | 5   | 105                             | 117 | 87  | 63   | 24   | 19   | 18   |
|                             | 6   | 114                             | 130 | 98  | 63   | 51   | 26   | 0    |

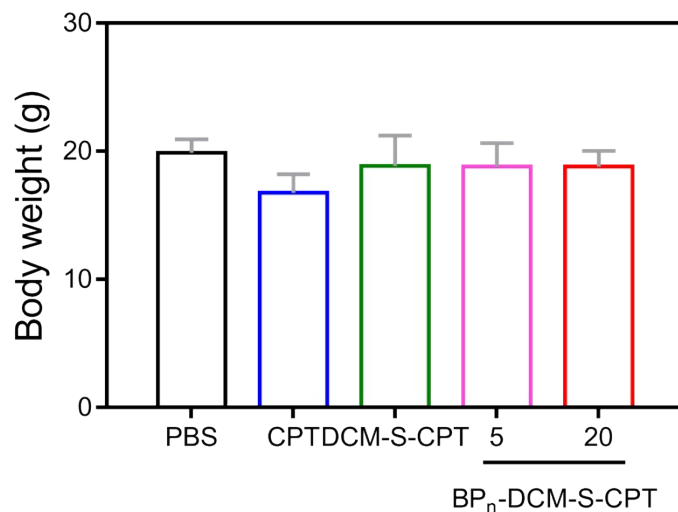

**Fig. S13** The body weights of each group of the mice at the end of the experiment.

**Table S3** Mean weight of tumors separated from mice after different treatments and inhibition rates of tumor growth (IRT) after treatment with CPT, DCM-S-CPT, BP<sub>5</sub>-DCM-S-CPT and BP<sub>20</sub>-DCM-S-CPT in HaLe tumor-bearing nude mice. The IRT is calculated using the following equation:  $IRT (\%) = 100 \times (\text{mean tumor weight of control group} - \text{mean tumor weight of experimental group}) / \text{mean tumor weight of control group}$ .

|                             | Tumor Weight (g) |      |      |      |      |      | mean $\pm$ SD   | IRT (%) |
|-----------------------------|------------------|------|------|------|------|------|-----------------|---------|
|                             | 1                | 2    | 3    | 4    | 5    | 6    |                 |         |
| PBS                         | 1.91             | 1.56 | 1.93 | 1.91 | 2.42 | 1.59 | 1.94 $\pm$ 0.31 |         |
| CPT                         | 0.91             | 0.83 | 0.87 | 1.14 | 0.45 | 0.83 | 0.84 $\pm$ 0.22 | 55.57   |
| DCM-S-CPT                   | 0.08             | 0.28 | 0.31 | 0.26 | 0.56 | 0.24 | 0.29 $\pm$ 0.16 | 84.72   |
| BP <sub>5</sub> -DCM-S-CPT  | 0.13             | 0.07 | 0.07 | 0.15 | 0.15 | 0.09 | 0.11 $\pm$ 0.04 | 94.17   |
| BP <sub>20</sub> -DCM-S-CPT | 0                | 0    | 0    | 0    | 0.04 | 0    | 0.01 $\pm$ 0.02 | 99.65   |

## 12. Characterization of Intermediate Compounds and DCM-S-CPT, BP<sub>5</sub>-DCM-S-CPT and BP<sub>20</sub>-DCM-S-CPT

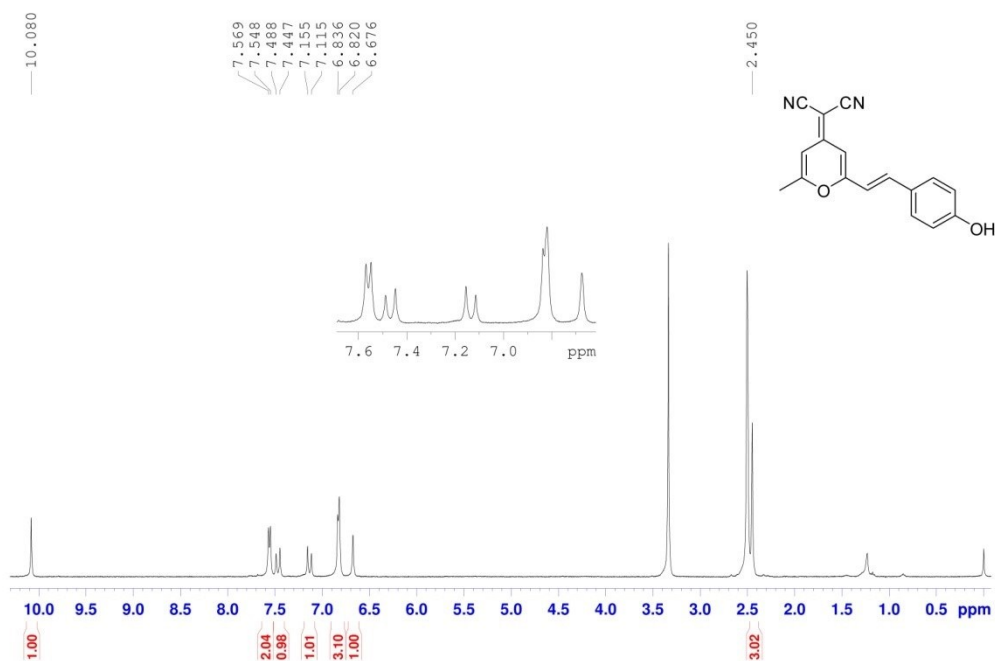

Fig. S14 <sup>1</sup>H NMR spectrum of DCM-OH in DMSO-*d*<sub>6</sub>

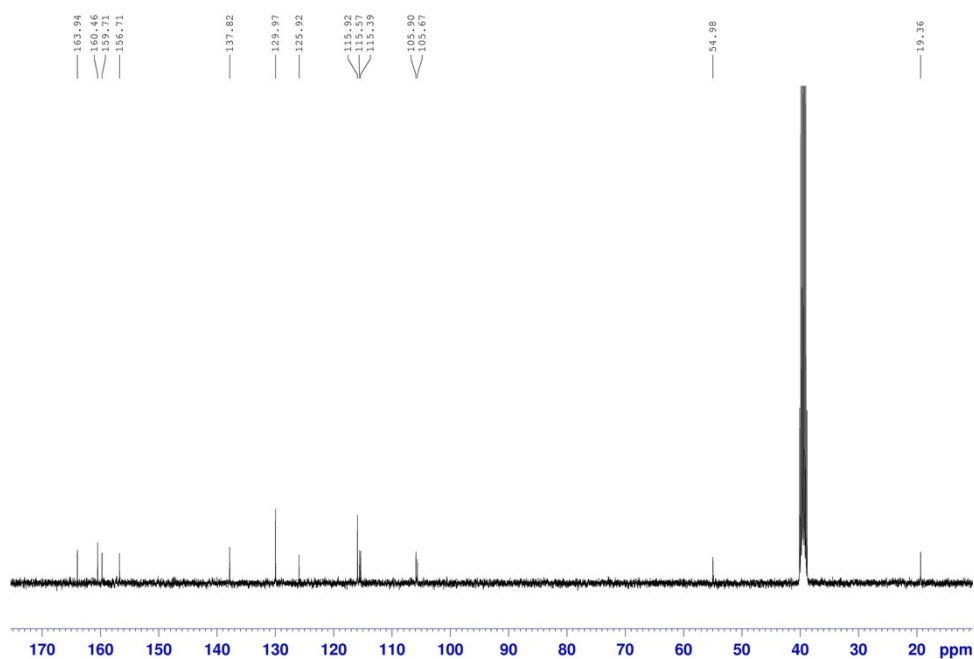

Fig. S15 <sup>13</sup>C NMR spectrum of DCM-OH in DMSO-*d*<sub>6</sub>

Monoisotopic Mass, Even Electron Ions  
 125 formula(e) evaluated with 13 results within limits (up to 1 closest results for each mass)  
 Elements Used:  
 C: 0-25 H: 0-70 N: 0-4 O: 0-6  
 WH-ZHU

ECUST institute of Fine Chem

08-Apr-2014  
 22:52:51  
 2: TOF MS ES-  
 4.32e+003

ZW-YCX-408 51 (1.671) Cm (50:56)

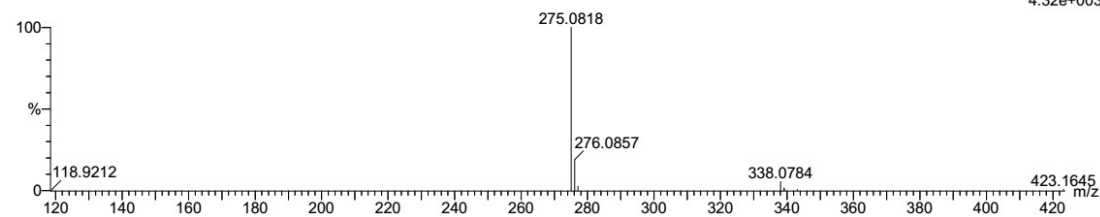

| Minimum: |            |      |      | -1.5  |       |              |               |
|----------|------------|------|------|-------|-------|--------------|---------------|
| Maximum: |            | 30.0 | 50.0 | 100.0 |       |              |               |
| Mass     | Calc. Mass | mDa  | PPM  | DBE   | i-FIT | i-FIT (Norm) | Formula       |
| 275.0818 | 275.0821   | -0.3 | -1.1 | 13.5  | 20.4  | 0.0          | C17 H11 N2 O2 |

**Fig. S16** HRMS spectrum of DCM-OH.

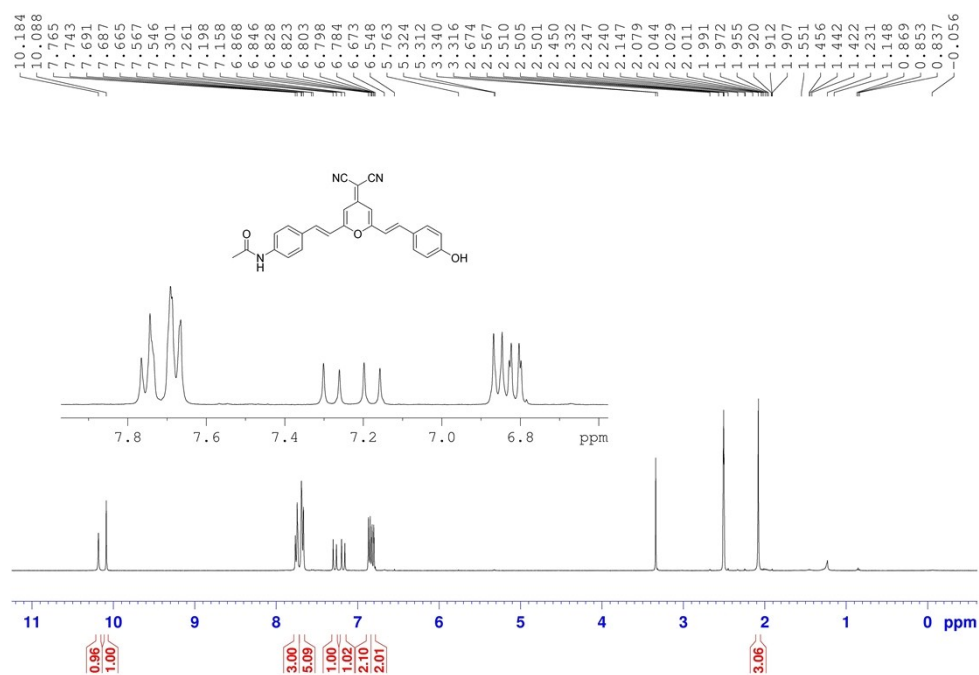

**Fig. S17**  $^1\text{H}$  NMR spectrum of BN-DCM-OH in  $\text{DMSO-}d_6$

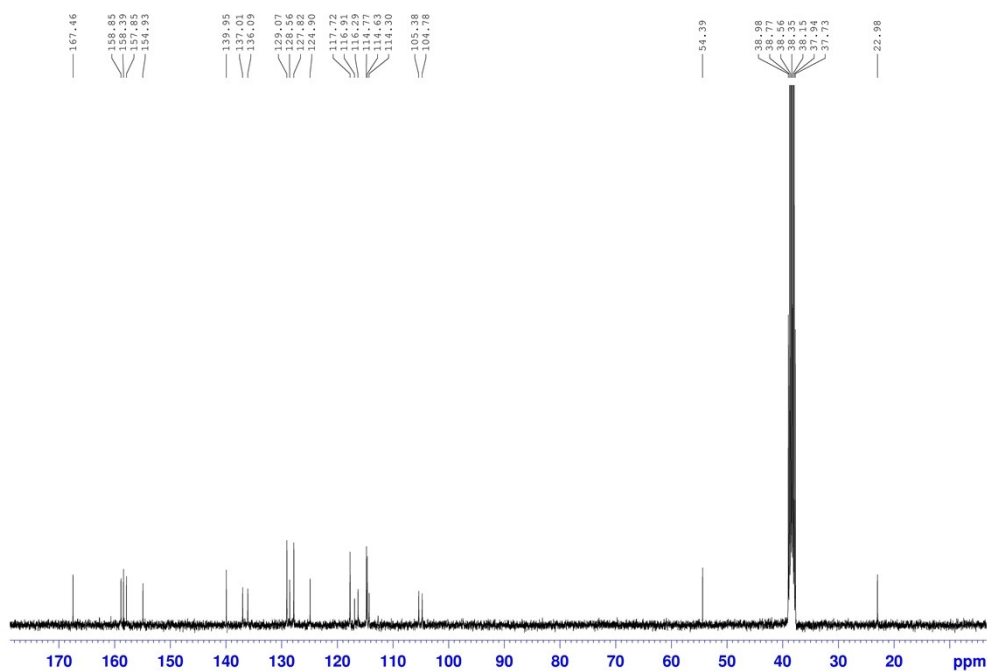

**Fig. S18**  $^{13}\text{C}$  NMR spectrum of BN-DCM-OH in  $\text{DMSO-}d_6$

Monoisotopic Mass, Even Electron Ions

77 formula(e) evaluated with 5 results within limits (up to 1 closest results for each mass)

Elements Used:

C: 0-36 H: 0-45 N: 0-4 O: 0-3

WH-ZHU

ECUST institute of Fine Chem

16-Apr-2014

15:08:10

2: TOF MS ES-

1.07e+003

ZW-YCX-444 13 (0.517) Cm (11:14)

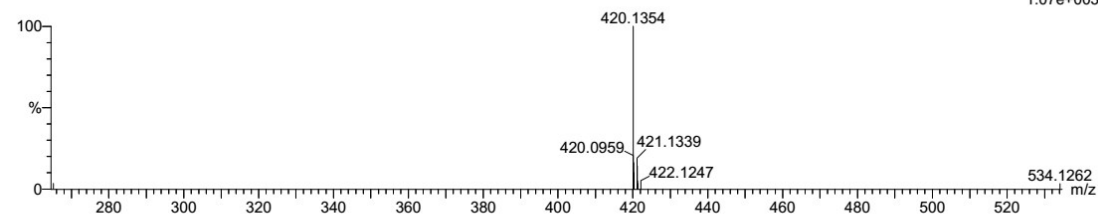

Minimum:

Maximum:

30.0

50.0

-1.5

100.0

| Mass     | Calc. Mass | mDa | PPM | DBE  | i-FIT | i-FIT (Norm) | Formula                                                       |
|----------|------------|-----|-----|------|-------|--------------|---------------------------------------------------------------|
| 420.1354 | 420.1348   | 0.6 | 1.4 | 19.5 | 77.5  | 0.0          | C <sub>26</sub> H <sub>18</sub> N <sub>3</sub> O <sub>3</sub> |

**Fig. S19** HRMS spectrum of BN-DCM-OH.

Monoisotopic Mass, Even Electron Ions

7 formula(e) evaluated with 1 results within limits (up to 1 best isotopic matches for each mass)

Elements Used:

C: 0-29 H: 0-22 N: 0-3 O: 0-3

WH-ZHU

ECUST institute of Fine Chem

08-May-2014

10:09:20

2: TOF MS ES-

5.35e+003

ZWH-YCX-408 30 (1.033) Cm (23:37)

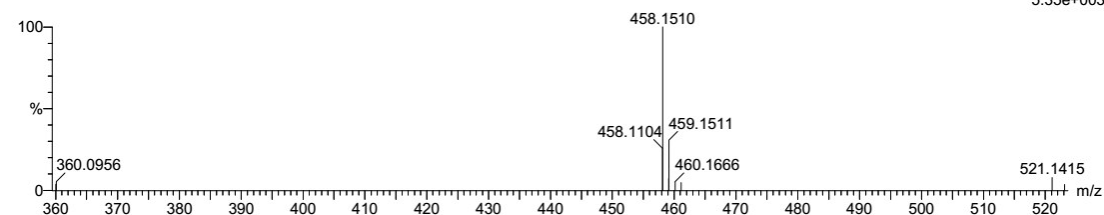

Minimum: -1.5  
Maximum: 30.0 50.0 100.0

| Mass     | Calc. Mass | mDa | PPM | DBE  | i-FIT | i-FIT (Norm) | Formula       |
|----------|------------|-----|-----|------|-------|--------------|---------------|
| 458.1510 | 458.1505   | 0.5 | 1.1 | 21.5 | 23.3  | 0.0          | C29 H20 N3 O3 |

Fig. S20 HRMS spectrum of BN-DCM-A.

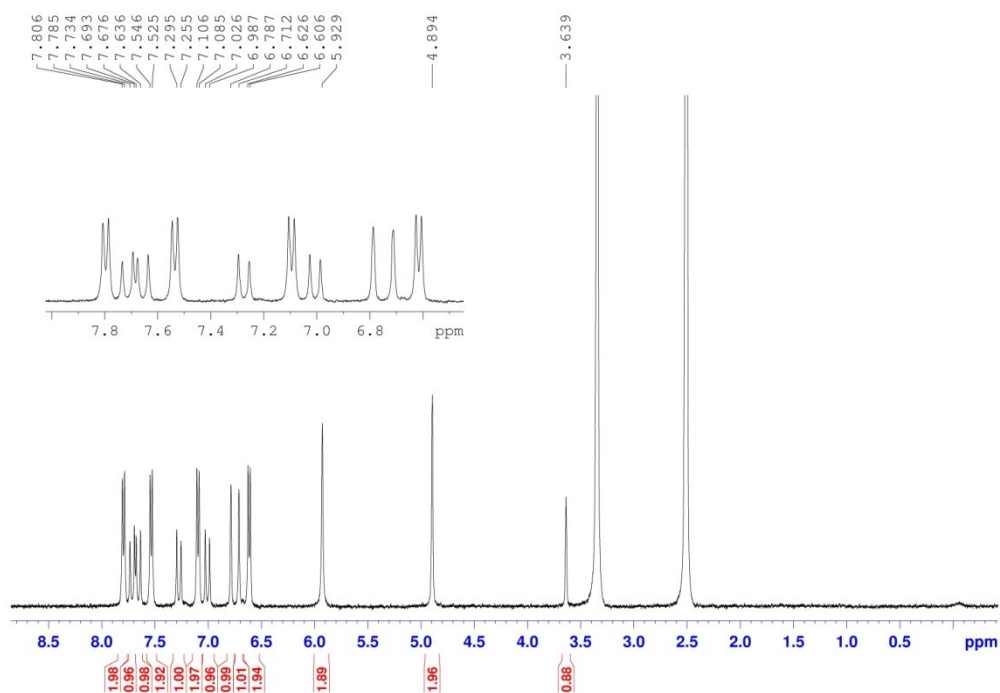

Fig. S21  $^1\text{H}$  NMR spectrum of A-DCM-NH<sub>2</sub> in DMSO-*d*<sub>6</sub>

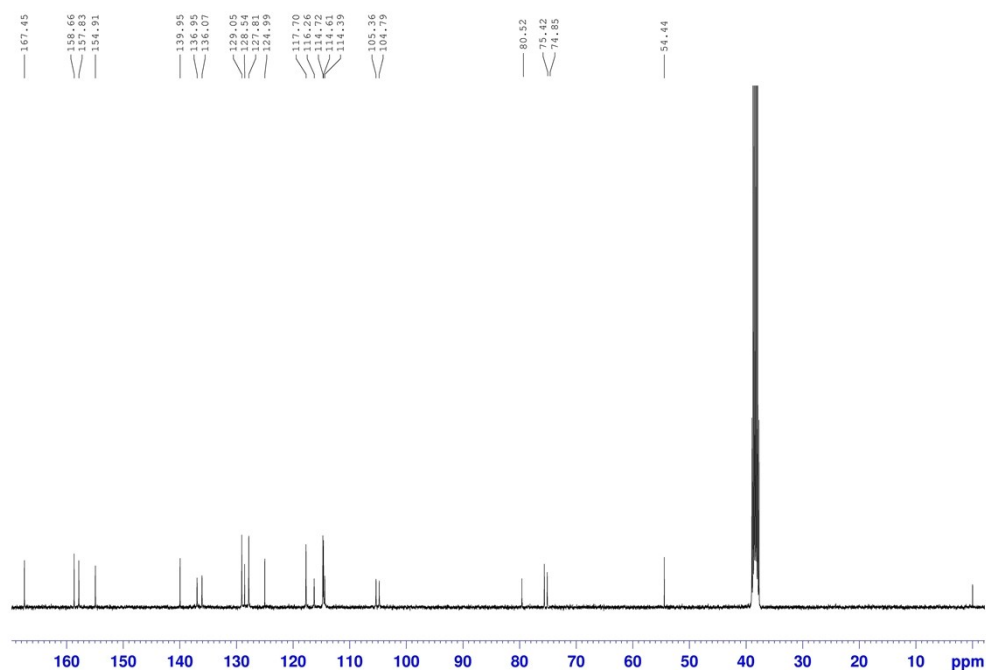

**Fig. S22**  $^{13}\text{C}$  NMR spectrum of A-DCM- $\text{NH}_2$  in  $\text{DMSO}-d_6$

Monoisotopic Mass, Even Electron Ions

4 formula(e) evaluated with 1 results within limits (up to 1 best isotopic matches for each mass)

Elements Used:

C: 0-27 H: 0-22 N: 0-3 O: 0-2

WH-ZHU

ECUST institute of Fine Chem

12-May-2014

10:54:17

1: TOF MS ES+

2.17e+003

ZW-YCX-513 20 (0.692) Cm (19:27)

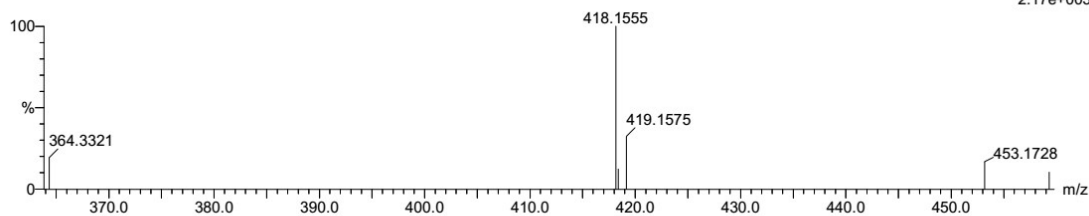

Minimum:

Maximum:

30.0 50.0 -1.5  
100.0

| Mass     | Calc. Mass | mDa  | PPM  | DBE  | i-FIT | i-FIT (Norm) | Formula       |
|----------|------------|------|------|------|-------|--------------|---------------|
| 418.1555 | 418.1556   | -0.1 | -0.2 | 19.5 | 18.3  | 0.0          | C27 H20 N3 O2 |

**Fig. S23** HRMS spectrum of A-DCM- $\text{NH}_2$ .

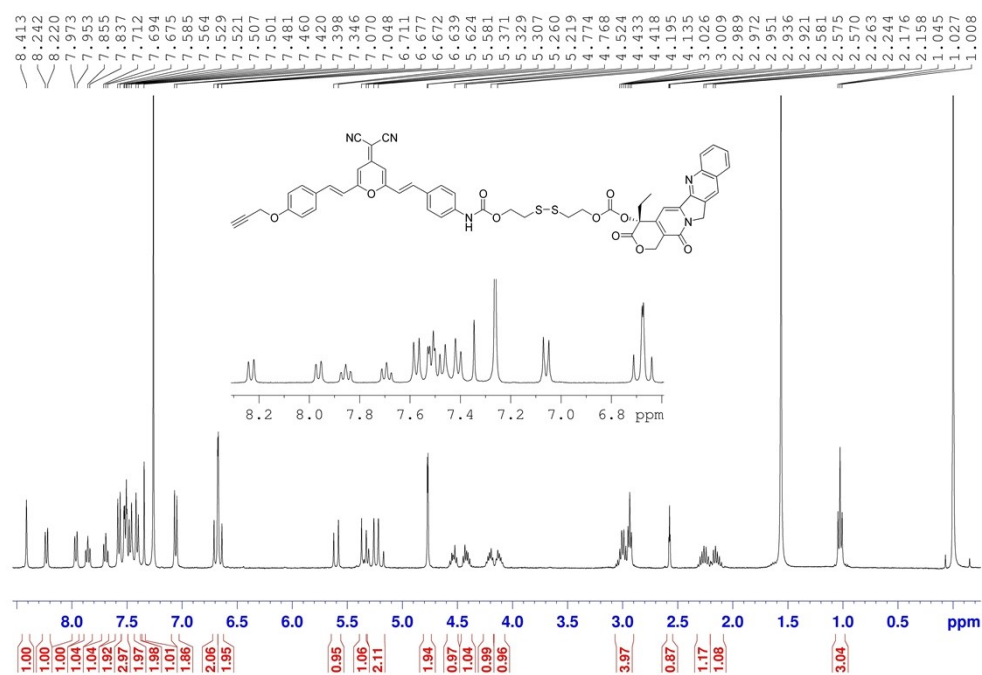

Fig. S24  $^1\text{H}$  NMR spectrum of DCM-S-CPT in  $\text{CDCl}_3$

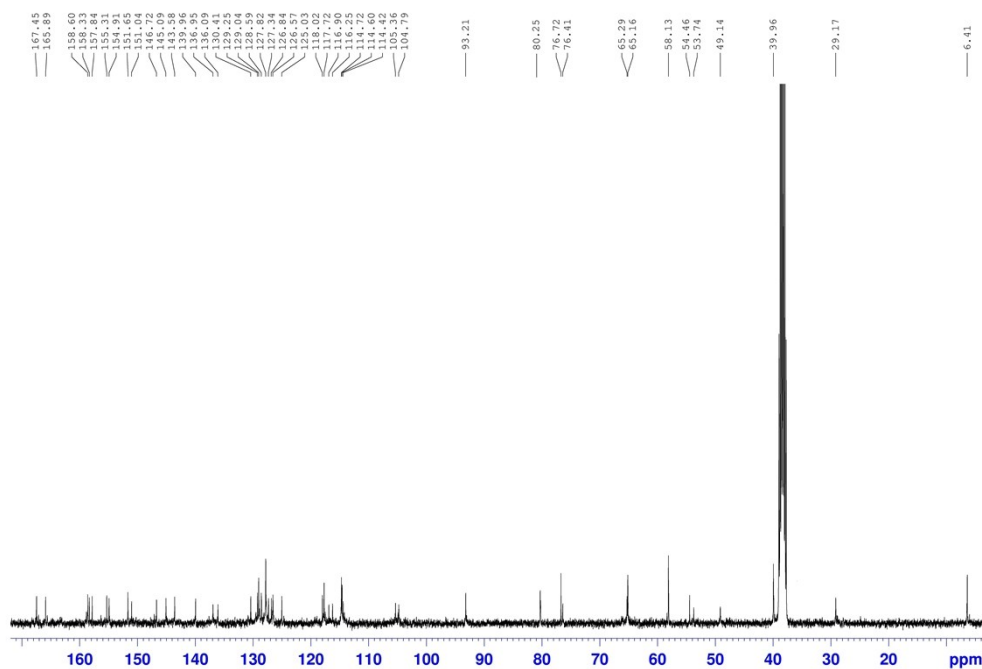

Fig. S25  $^{13}\text{C}$  NMR spectrum of DCM-S-CPT in  $\text{DMSO}-d_6$

Monoisotopic Mass, Even Electron Ions  
165 formula(e) evaluated with 1 results within limits (up to 1 best isotopic matches for each mass)

Elements Used:

C: 0-53 H: 0-50 N: 0-5 O: 0-10 S: 0-2

WH-ZHU

ECUST institute of Fine Chem

ZW-YCX-918 62 (1.997) Cm (60:68)

19-Sep-2014

01:20:46

1: TOF MS ES+

4.63e+003

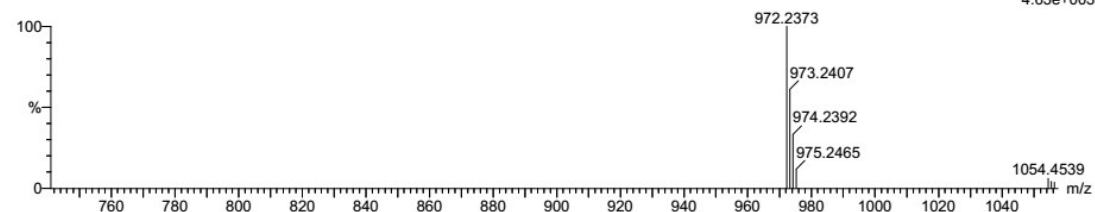

| Minimum: |            |      |      | -1.5  |       |              |                   |
|----------|------------|------|------|-------|-------|--------------|-------------------|
| Maximum: |            | 30.0 | 50.0 | 100.0 |       |              |                   |
| Mass     | Calc. Mass | mDa  | PPM  | DBE   | i-FIT | i-FIT (Norm) | Formula           |
| 972.2373 | 972.2373   | 0.0  | 0.0  | 35.5  | 9.5   | 0.0          | C53 H42 N5 O10 S2 |

Fig. S26 HRMS spectrum of DCM-S-CPT.

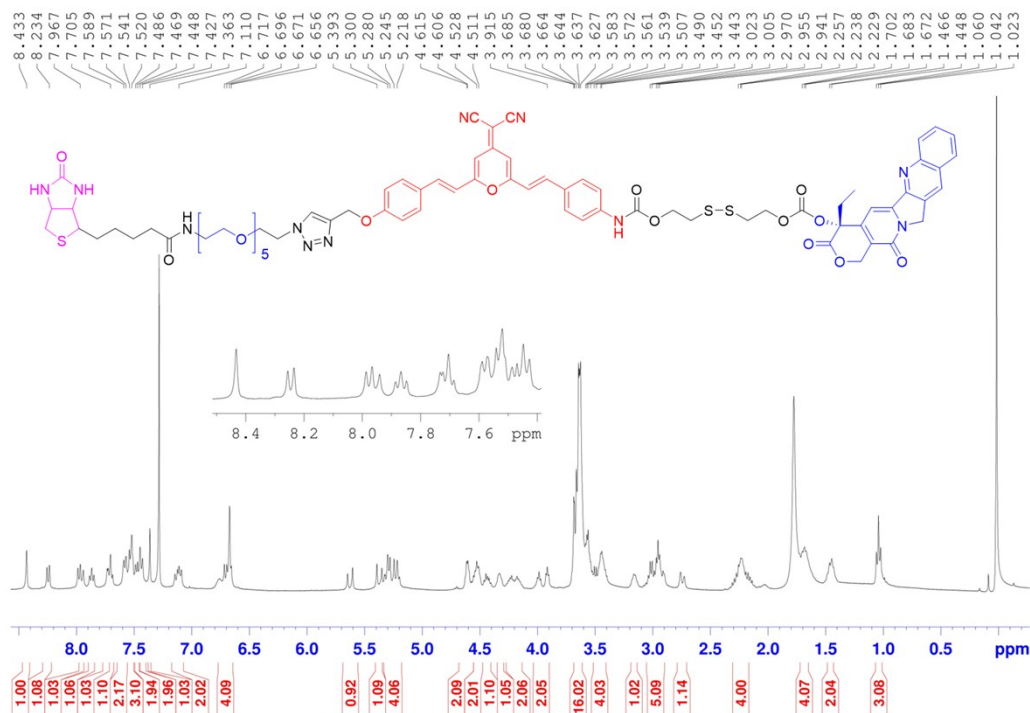

Fig. S27  $^1\text{H}$  NMR spectrum of BP<sub>5</sub>-DCM-S-CPT in  $\text{CDCl}_3$

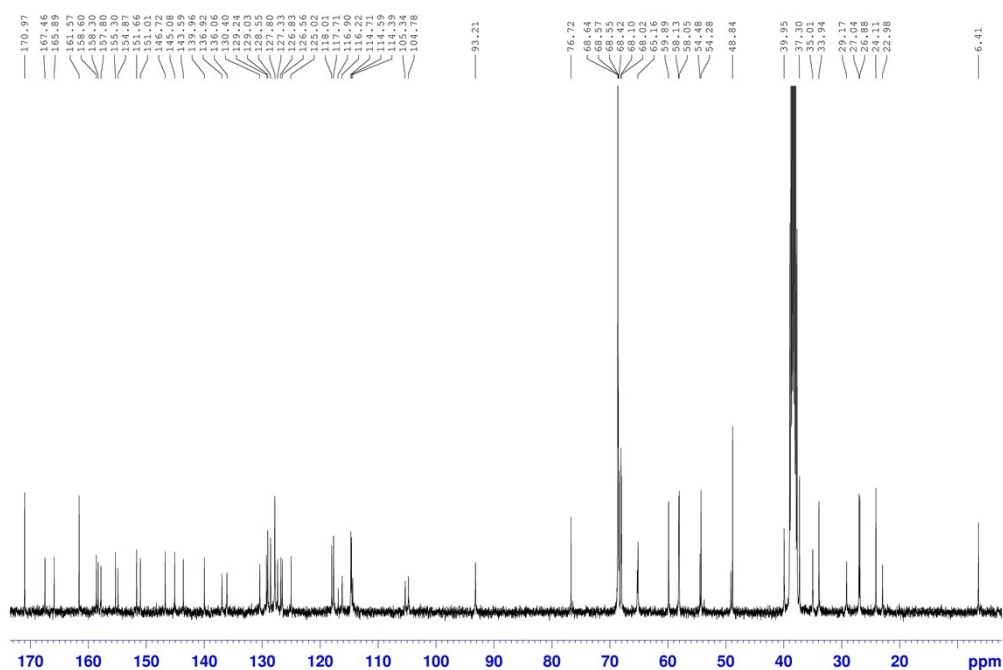

**Fig. S28**  $^{13}\text{C}$  NMR spectrum of BP<sub>5</sub>-DCM-S-CPT in DMSO- $d_6$

Monoisotopic Mass, Even Electron Ions

829 formula(e) evaluated with 1 results within limits (up to 1 best isotopic matches for each mass)

Elements Used:

C: 0-75 H: 0-82 N: 0-11 O: 0-17 S: 0-3

ZL

ECUST institute of Fine Chem

28-Apr-2015

17:14:21

1: TOF MS ES+

2.20e+001

ZL-CDD-04 43 (1.407) Cm (43)

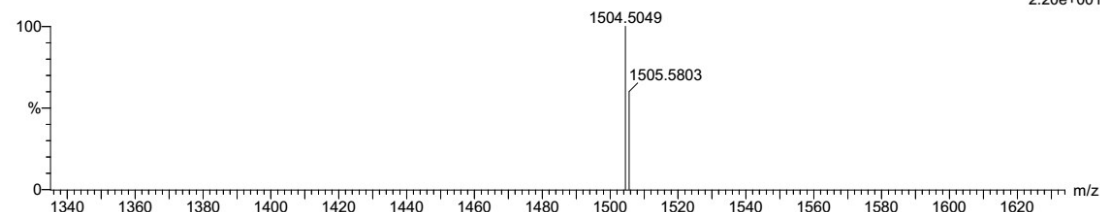

Minimum: -1.5  
Maximum: 300.0 50.0 100.0

| Mass      | Calc. Mass | mDa  | PPM  | DBE  | i-FIT | i-FIT (Norm) | Formula            |
|-----------|------------|------|------|------|-------|--------------|--------------------|
| 1504.5049 | 1504.5052  | -0.3 | -0.2 | 40.5 | 12.4  | 0.0          | C75 H82 N11 O17 S3 |

**Fig. S29** HRMS spectrum of BP<sub>5</sub>-DCM-S-CPT.

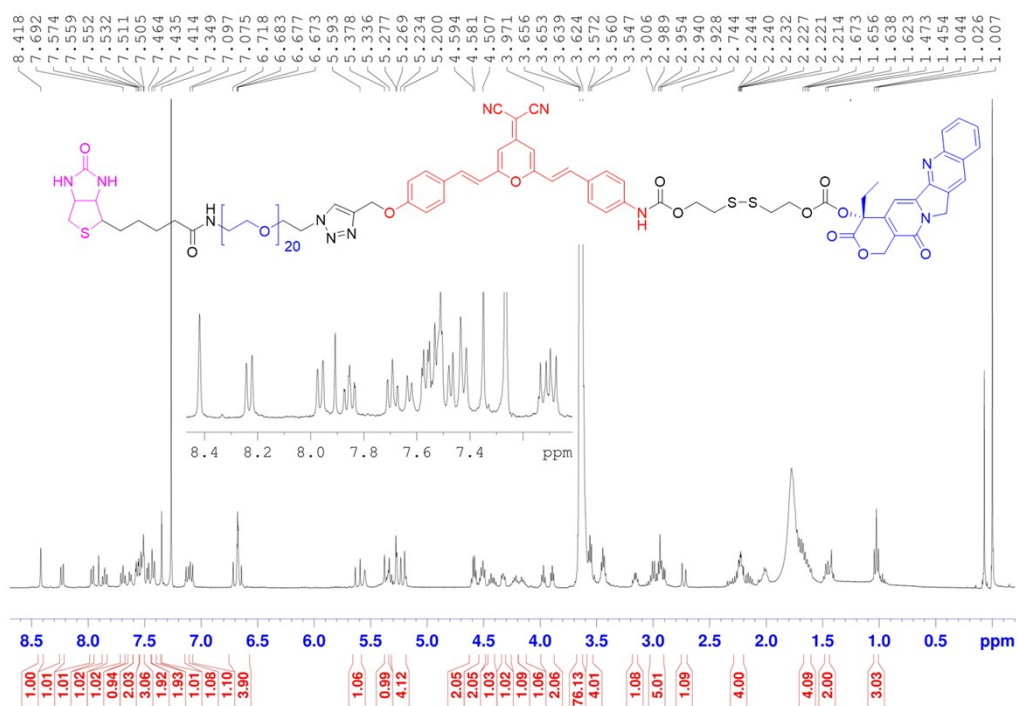

Fig. S30 <sup>1</sup>H NMR spectrum of BP<sub>20</sub>-DCM-S-CPT in CDCl<sub>3</sub>

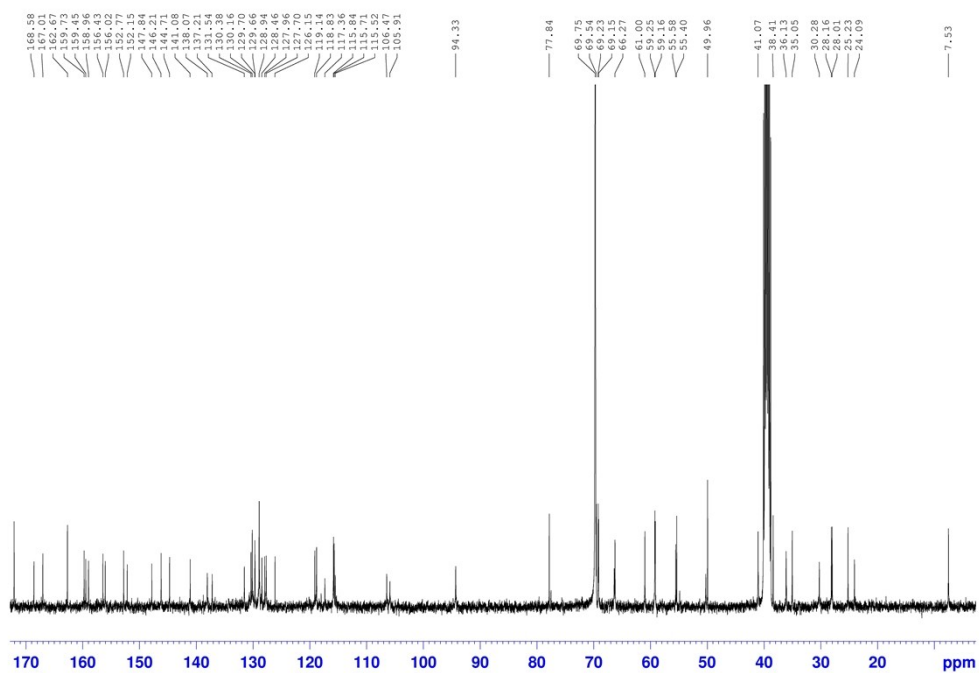

Fig. S31 <sup>13</sup>C NMR spectrum of BP<sub>20</sub>-DCM-S-CPT in DMSO-*d*<sub>6</sub>

Monoisotopic Mass, Even Electron Ions  
 1549 formula(e) evaluated with 1 results within limits (up to 1 best isotopic matches for each mass)  
 Elements Used:  
 C: 0-105 H: 0-142 N: 0-11 O: 0-32 S: 0-3  
 WH-ZHU

ECUST institute of Fine Chem

10-Apr-2017  
 14:39:45  
 1: TOF MS ES+  
 4.05e+000

ZW-YCX-Z20 145 (1.871) Cm (145:151)

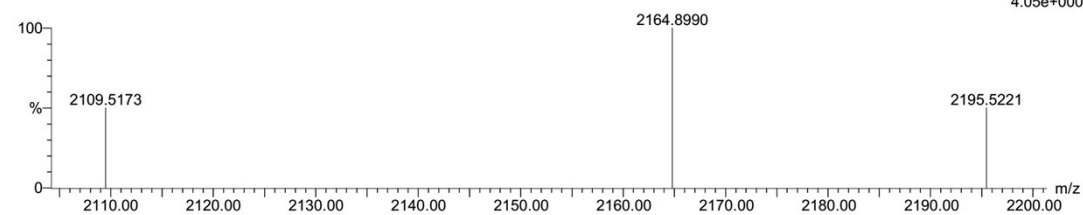

| Minimum:  |            |      |      | -1.5  |       |              |         |                 |  |
|-----------|------------|------|------|-------|-------|--------------|---------|-----------------|--|
| Maximum:  |            | 30.0 | 50.0 | 100.0 |       |              |         |                 |  |
| Mass      | Calc. Mass | mDa  | PPM  | DBE   | i-FIT | i-FIT (Norm) | Formula |                 |  |
| 2164.8990 | 2164.8985  | 0.5  | 0.3  | 40.5  | 30.5  | 0.0          | C105    | H142 N11 O32 S3 |  |

**Fig. S32** HRMS spectrum of BP<sub>20</sub>-DCM-S-CPT.

## References

1. M. Z. Ye, X. H. Wang, J. B. Tang, Z. Q. Guo, Y. Q. Shen, H. Tian and W. H. Zhu, *Chem. Sci.*, 2016, **7**, 4958-4965.
